# Supplementary material for: The impact of gas purity on observed reactivity with NO using inductively coupled plasma tandem mass spectrometry
Source: Royal Society of Chemistry journal article supplement (doi:10.1039/d4an01227e), 2024-01-01
Supplement: d4an01227e2.xlsx [file d4an01227e2.xlsx]

## Sheet: max probability summary
collisions at max probability
	-1V	-10V	-15V	-25V
mass	0.22 mL/min	0.45 mL/min	0.89 ml/min	1.49 mL/min
9	3	4	6	10
11	2	3	5	8
23	4	6	10	16
24	3	5	8	12
27	3	4	7	10
39	5	8	13	22
40	4	6	10	17
51	3	5	9	14
52	3	5	9	14
55	3	5	9	13
56	3	5	8	13
59	3	5	8	13
60	3	5	8	12
64	3	5	8	12
66	3	5	8	12
70	3	4	7	11
75	3	4	6	10
78	3	4	6	9
85	5	8	15	24
88	4	7	12	19
95	4	6	10	16
106	3	5	9	14
107	3	5	9	14
114	3	5	8	13
115	4	7	12	19
133	6	10	17	28
137	5	8	14	23
139	4	6	10	16
140	4	6	10	15
141	4	6	10	15
146	4	6	10	15
147	4	6	10	15
153	4	6	10	15
157	4	6	10	15
163	4	6	10	15
165	4	6	9	15
166	4	6	9	15
169	4	6	9	15
172	4	6	9	15
175	3	5	9	15
182	4	6	10	16
193	4	6	10	15
195	4	6	9	15
197	3	5	9	15
205	3	5	8	13
208	3	5	8	13
232	4	6	10	15
238	3	5	8	12
237	4	6	11	17
239	3	5	9	15
243	5	8	14	22
239	4	7	13	21

## Sheet: 0.22 mL.min
0.22 mL/min
	/collision	0	1	2	3	4	5	6	7	8	9	10	11	12	13	14	15	16	17	18	19	20	21	22	23	24	25	26	27	28	29	30	31	32	33	34	35	36	37	38	39	40	j
mass/
9		29.4608	36.0043	22.0006	8.96239	2.73826	0.66929	0.136324	0.0238005	0.00363585	0.000493711	6.0337e-05	6.70349e-06	6.827e-07	6.41796e-08	5.60246e-09	4.56455e-10	3.48649e-11	2.50639e-12	1.70172e-13	1.09457e-14	6.68842e-16	3.89238e-17	2.16223e-18	1.14891e-19	5.85037e-21	2.85992e-22	1.34428e-23	6.08467e-25	2.65576e-26	1.11918e-27	4.55922e-29	1.79738e-30	6.86434e-32	2.54212e-33	9.13748e-35	3.19057e-36	1.08312e-37	3.57754e-39	1.15057e-40	3.60543e-42	1.10156e-43	3
11		37.9939	36.7684	17.7912	5.73913	1.3885	0.268744	0.0433459	0.00599255	0.000724908	7.79474e-05	7.54332e-06	6.63638e-07	5.35194e-08	3.98409e-09	2.75399e-10	1.77677e-11	1.07467e-12	6.11766e-14	3.28908e-15	1.67526e-16	8.10612e-18	3.73555e-19	1.64321e-20	6.91396e-22	2.7879e-23	1.07919e-24	4.01685e-26	1.43974e-27	4.97607e-29	1.66054e-30	5.35661e-32	1.6722e-33	5.05709e-35	1.48302e-36	4.22115e-38	1.16714e-39	3.13749e-41	8.20619e-43	2.08987e-44	5.1858e-46	1.25463e-47	2
23		11.0111	24.2934	26.7989	19.7085	10.8706	4.79667	1.76379	0.555913	0.153312	0.0375829	0.0082918	0.00166308	0.000305767	5.18927e-05	8.17779e-06	1.20283e-06	1.6586e-07	2.15254e-08	2.63837e-09	3.06366e-10	3.37963e-11	3.55065e-12	3.56076e-13	3.41565e-14	3.13993e-15	2.77101e-16	2.35138e-17	1.9214e-18	1.51397e-19	1.1518e-20	8.47062e-22	6.02853e-23	4.15642e-24	2.77884e-25	1.8032e-26	1.13667e-27	6.96609e-29	4.1538e-30	2.41168e-31	1.36431e-32	7.52509e-34	4
24		20.1239	32.2639	25.8637	13.8221	5.54014	1.77646	0.47469	0.108722	0.0217887	0.00388146	0.0006223	9.0701e-05	1.21181e-05	1.49451e-06	1.71149e-07	1.82932e-08	1.83305e-09	1.72874e-10	1.5398e-11	1.29932e-12	1.04157e-13	7.95199e-15	5.79507e-16	4.03958e-17	2.69854e-18	1.73059e-19	1.06715e-20	6.33677e-22	3.6284e-23	2.00596e-24	1.07203e-25	5.54434e-27	2.77783e-28	1.34957e-29	6.36389e-31	2.91514e-32	1.29826e-33	5.62556e-35	2.37349e-36	9.75726e-38	3.91087e-39	3
27		27.5941	35.5293	22.8732	9.81693	3.15999	0.813742	0.174625	0.0321202	0.00516961	0.000739581	9.52262e-05	1.11464e-05	1.19598e-06	1.18454e-07	1.08941e-08	9.35129e-10	7.52526e-11	5.69958e-12	4.077e-13	2.76285e-14	1.77868e-15	1.09056e-16	6.38259e-18	3.57305e-19	1.91689e-20	9.87253e-22	4.88906e-23	2.33148e-24	1.07212e-25	4.76011e-27	2.04299e-28	8.48544e-30	3.41425e-31	1.33214e-32	5.04478e-34	1.85586e-35	6.63762e-37	2.30984e-38	7.82651e-40	2.58389e-41	8.31733e-43	3
39		4.78513	14.5452	22.1061	22.3984	17.0208	10.3475	5.24214	2.27633	0.864907	0.292114	0.0887925	0.0245362	0.00621515	0.00145322	0.000315522	6.39385e-05	1.21469e-05	2.17191e-06	3.66771e-07	5.86767e-08	8.91785e-09	1.29082e-09	1.78348e-10	2.35702e-11	2.98522e-12	3.62962e-13	4.24339e-14	4.7772e-15	5.18609e-16	5.43584e-17	5.50769e-18	5.40048e-19	5.12988e-20	4.72517e-21	4.22438e-22	3.66877e-23	3.09772e-24	2.54487e-25	2.03566e-26	1.58659e-27	1.20567e-28	5
40		10.388	23.5239	26.6351	20.1052	11.3821	5.155	1.9456	0.629406	0.178162	0.044828	0.0101514	0.00208981	0.000394368	6.86963e-05	1.11117e-05	1.67751e-06	2.37422e-07	3.16262e-08	3.97878e-09	4.74211e-10	5.3693e-11	5.78993e-12	5.95972e-13	5.86778e-14	5.53653e-15	5.01503e-16	4.36793e-17	3.66342e-18	2.96282e-19	2.31357e-20	1.74637e-21	1.2757e-22	9.02767e-24	6.19494e-25	4.12604e-26	2.66957e-27	1.67924e-28	1.02775e-29	6.12462e-31	3.55623e-32	2.01329e-33	4
51		14.3711	27.8792	27.0422	17.4868	8.48089	3.2905	1.0639	0.294845	0.0714981	0.0154114	0.00298974	0.000527267	8.52393e-05	1.272e-05	1.76258e-06	2.27955e-07	2.76388e-08	3.154e-09	3.39922e-10	3.47069e-11	3.36649e-12	3.10991e-13	2.74231e-14	2.31302e-15	1.86964e-16	1.4508e-17	1.08249e-18	7.77772e-20	5.38871e-21	3.60477e-22	2.33102e-23	1.45873e-24	8.84334e-26	5.19868e-27	2.96623e-28	1.6441e-29	8.85962e-31	4.64519e-32	2.37143e-33	1.17961e-34	5.72094e-36	3
52		15.3706	28.7847	26.9528	16.8249	7.87707	2.9503	0.920843	0.246353	0.0576686	0.0119996	0.00224719	0.000382576	5.97046e-05	8.60073e-06	1.15048e-06	1.43634e-07	1.68116e-08	1.85196e-09	1.92677e-10	1.8991e-11	1.77823e-12	1.58577e-13	1.34986e-14	1.09909e-15	8.57615e-17	6.42427e-18	4.62723e-19	3.20944e-20	2.14655e-21	1.38617e-22	8.65296e-24	5.22726e-25	3.05911e-26	1.73601e-27	9.56191e-29	5.1162e-30	2.66144e-31	1.34706e-32	6.63855e-34	3.18772e-35	1.49242e-36	3
55		16.4202	29.6656	26.7979	16.1382	7.28908	2.63378	0.793057	0.204684	0.0462242	0.00927906	0.00167641	0.000275337	4.14534e-05	5.76094e-06	7.43433e-07	8.95421e-08	1.01108e-08	1.07451e-09	1.07849e-10	1.02551e-11	9.26372e-13	7.96971e-14	6.54481e-15	5.14098e-16	3.87e-17	2.79671e-18	1.94335e-19	1.30036e-20	8.39039e-22	5.2271e-23	3.14787e-24	1.83456e-25	1.03576e-26	5.67049e-28	3.01313e-29	1.55535e-30	7.80551e-32	3.81133e-33	1.81205e-34	8.39424e-36	3.79139e-37	3
56		17.5206	30.5172	26.5774	15.4308	6.71932	2.34073	0.679513	0.169082	0.0368132	0.00712457	0.00124095	0.000196499	2.85217e-05	3.82146e-06	4.75443e-07	5.52083e-08	6.0101e-09	6.15786e-10	5.95874e-11	5.46258e-12	4.75735e-13	3.94587e-14	3.12404e-15	2.36584e-16	1.71701e-17	1.19627e-18	8.01406e-20	5.16994e-21	3.21607e-22	1.93163e-23	1.1215e-24	6.30137e-26	3.42991e-27	1.81036e-28	9.27435e-30	4.61543e-31	2.23309e-32	1.05124e-33	4.81855e-35	2.15203e-36	9.37099e-38	3
59		18.438	31.1742	26.354	14.8527	6.27808	2.12294	0.598229	0.144494	0.0305381	0.00573693	0.000969976	0.00014909	2.10063e-05	2.73204e-06	3.29944e-07	3.71903e-08	3.92998e-09	3.90861e-10	3.67139e-11	3.26707e-12	2.76191e-13	2.22367e-14	1.70895e-15	1.25627e-16	8.85018e-18	5.9854e-19	3.89225e-20	2.43735e-21	1.47177e-22	8.58073e-24	4.83597e-25	2.63757e-26	1.39359e-27	7.14005e-29	3.55061e-30	1.71521e-31	8.05554e-33	3.68107e-34	1.63784e-35	7.10048e-37	3.0013e-38	3
60		19.1479	31.6511	26.1592	14.4135	5.95629	1.96912	0.542485	0.128102	0.0264687	0.00486134	0.000803567	0.000120752	1.66334e-05	2.11497e-06	2.49714e-07	2.7518e-08	2.84291e-09	2.76427e-10	2.53849e-11	2.20845e-12	1.82526e-13	1.43672e-14	1.07948e-15	7.75806e-17	5.34329e-18	3.53293e-19	2.24609e-20	1.37509e-21	8.1178e-23	4.62708e-24	2.54948e-25	1.35943e-26	7.0222e-28	3.51743e-29	1.71007e-30	8.07627e-32	3.7083e-33	1.65668e-34	7.20646e-36	3.05439e-37	1.26221e-38	3
64		20.1239	32.2639	25.8637	13.8221	5.54014	1.77646	0.47469	0.108722	0.0217887	0.00388146	0.0006223	9.0701e-05	1.21181e-05	1.49451e-06	1.71149e-07	1.82932e-08	1.83305e-09	1.72874e-10	1.5398e-11	1.29932e-12	1.04157e-13	7.95199e-15	5.79507e-16	4.03958e-17	2.69854e-18	1.73059e-19	1.06715e-20	6.33677e-22	3.6284e-23	2.00596e-24	1.07203e-25	5.54434e-27	2.77783e-28	1.34957e-29	6.36389e-31	2.91514e-32	1.29826e-33	5.62556e-35	2.37349e-36	9.75726e-38	3.91087e-39	3
66		20.8779	32.7048	25.6157	13.3755	5.23811	1.64108	0.428452	0.0958802	0.0187743	0.00326773	0.000511883	7.28959e-05	9.51582e-06	1.14664e-06	1.28299e-07	1.33986e-08	1.31178e-09	1.20876e-10	1.05194e-11	8.67285e-13	6.79292e-14	5.06713e-15	3.60798e-16	2.45732e-17	1.60389e-18	1.00498e-19	6.05495e-21	3.51295e-22	1.96534e-23	1.06161e-24	5.5433e-26	2.80112e-27	1.37122e-28	6.50904e-30	2.99891e-31	1.34221e-32	5.84039e-34	2.47266e-35	1.01931e-36	4.09417e-38	1.60336e-39	3
70		22.443	33.5342	25.0532	12.4781	4.66116	1.39293	0.346884	0.0740444	0.0138296	0.002296	0.000343066	4.66005e-05	5.8025e-06	6.66927e-07	7.11797e-08	7.0904e-09	6.6215e-10	5.81987e-11	4.83111e-12	3.79926e-13	2.83841e-14	2.01958e-15	1.37166e-16	8.91093e-18	5.54776e-19	3.31577e-20	1.90553e-21	1.05453e-22	5.62738e-24	2.89944e-25	1.44411e-26	6.96055e-28	3.25012e-29	1.4716e-30	6.46723e-32	2.76093e-33	1.14593e-34	4.62768e-36	1.81964e-37	6.97152e-39	2.60419e-40	3
75		28.8304	35.8575	22.2987	9.24459	2.87447	0.715018	0.148216	0.0263346	0.00409417	0.000565787	7.03691e-05	7.95644e-06	8.24645e-07	7.88957e-08	7.00898e-09	5.81156e-10	4.51754e-11	3.30509e-12	2.2837e-13	1.49491e-14	9.29641e-16	5.50586e-17	3.11266e-18	1.68319e-19	8.72272e-21	4.33952e-22	2.07586e-23	9.56231e-25	4.24751e-26	1.82165e-27	7.55221e-29	3.02999e-30	1.17766e-31	4.43851e-33	1.62363e-34	5.76964e-36	1.99331e-37	6.70044e-39	2.19305e-40	6.99381e-42	2.17462e-43	3
78		32.3964	36.5147	20.5783	7.73143	2.17857	0.491103	0.0922556	0.0148548	0.0020929	0.000262106	2.95426e-05	3.0271e-06	2.84326e-07	2.46516e-08	1.98467e-09	1.49131e-10	1.05056e-11	6.96535e-13	4.36156e-14	2.58738e-15	1.45815e-16	7.82625e-18	4.00961e-19	1.96492e-20	9.22797e-22	4.16042e-23	1.80358e-24	7.52911e-26	3.0308e-27	1.17796e-28	4.42569e-30	1.60913e-31	5.66776e-33	1.93584e-34	6.41744e-36	2.06664e-37	6.47045e-39	1.97108e-40	5.84645e-42	1.68966e-43	4.76113e-45	3
85		3.25582	11.1503	19.0934	21.7965	18.6618	12.7823	7.29596	3.56952	1.52808	0.581472	0.199138	0.0619994	0.0176942	0.00466138	0.00114028	0.000260343	5.57253e-05	1.12261e-05	2.13591e-06	3.84994e-07	6.5925e-08	1.07512e-08	1.67363e-09	2.49205e-10	3.55608e-11	4.87144e-12	6.41667e-13	8.13901e-14	9.95495e-15	1.17562e-15	1.34206e-16	1.48264e-17	1.58676e-18	1.64673e-19	1.65871e-20	1.62303e-21	1.54401e-22	1.42914e-23	1.288e-24	1.13104e-25	9.68373e-27	5
88		7.0951	18.772	24.8331	21.9009	14.4861	7.66539	3.38014	1.27758	0.422522	0.12421	0.0328632	0.00790439	0.00174276	0.000354688	6.70301e-05	1.18231e-05	1.95507e-06	3.04273e-07	4.47242e-08	6.22789e-09	8.23877e-10	1.03799e-10	1.24831e-11	1.43597e-12	1.58302e-13	1.67532e-14	1.70481e-15	1.67057e-16	1.57855e-17	1.44016e-18	1.27011e-19	1.084e-20	8.96256e-22	7.18571e-23	5.59168e-24	4.22693e-25	3.10652e-26	2.22139e-27	1.54665e-28	1.04925e-29	6.94017e-31	4
95		11.0111	24.2934	26.7989	19.7085	10.8706	4.79667	1.76379	0.555913	0.153312	0.0375829	0.0082918	0.00166308	0.000305767	5.18927e-05	8.17779e-06	1.20283e-06	1.6586e-07	2.15254e-08	2.63837e-09	3.06366e-10	3.37963e-11	3.55065e-12	3.56076e-13	3.41565e-14	3.13993e-15	2.77101e-16	2.35138e-17	1.9214e-18	1.51397e-19	1.1518e-20	8.47062e-22	6.02853e-23	4.15642e-24	2.77884e-25	1.8032e-26	1.13667e-27	6.96609e-29	4.1538e-30	2.41168e-31	1.36431e-32	7.52509e-34	4
106		14.765	28.2441	27.0142	17.2253	8.23762	3.15157	1.00478	0.27458	0.0656558	0.0139549	0.00266945	0.00046422	7.4001e-05	1.0889e-05	1.48784e-06	1.89741e-07	2.26848e-08	2.55259e-09	2.71272e-10	2.73115e-11	2.61223e-12	2.37951e-13	2.069e-14	1.72079e-15	1.37155e-16	1.04946e-17	7.72125e-19	5.4704e-20	3.73729e-21	2.46521e-22	1.57191e-23	9.69976e-25	5.79837e-26	3.36114e-27	1.89105e-28	1.03355e-29	5.49191e-31	2.83934e-32	1.42932e-33	7.01066e-35	3.35269e-36	3
107		15.5765	28.963	26.927	16.6895	7.75812	2.8851	0.894097	0.237499	0.0552008	0.0114045	0.00212057	0.000358454	5.55427e-05	7.94435e-06	1.05513e-06	1.30794e-07	1.52e-08	1.66253e-09	1.7174e-10	1.6807e-11	1.56256e-12	1.38354e-13	1.16935e-14	9.45344e-16	7.32408e-17	5.44738e-18	3.89573e-19	2.68287e-20	1.78162e-21	1.14233e-22	7.08021e-24	4.24677e-25	2.46765e-26	1.39041e-27	7.60396e-29	4.03967e-30	2.0865e-31	1.04855e-32	5.13076e-34	2.4462e-35	1.13712e-36	3
114		17.7468	30.6836	26.5254	15.2872	6.60774	2.28491	0.658421	0.162627	0.035147	0.00675198	0.00116739	0.000183489	2.64372e-05	3.51608e-06	4.34226e-07	5.00508e-08	5.4085e-09	5.50065e-10	5.28357e-11	4.80795e-12	4.15639e-13	3.42202e-14	2.68934e-15	2.02164e-16	1.45639e-17	1.00722e-18	6.69788e-20	4.28904e-21	2.64843e-22	1.57898e-23	9.09998e-25	5.07534e-26	2.74221e-27	1.43672e-28	7.30601e-30	3.60909e-31	1.73333e-32	8.09964e-34	3.68526e-35	1.63377e-36	7.0618e-38	3
115		6.98341	18.5873	24.7363	21.9463	14.6032	7.77368	3.44845	1.31121	0.436246	0.129014	0.0343388	0.00830885	0.00184293	0.000377322	7.17353e-05	1.27289e-05	2.11747e-06	3.31525e-07	4.90222e-08	6.86731e-09	9.13913e-10	1.15833e-10	1.40139e-11	1.62173e-12	1.79852e-13	1.9148e-14	1.96019e-15	1.93234e-16	1.83685e-17	1.68587e-18	1.49572e-19	1.28421e-20	1.06816e-21	8.61528e-23	6.74432e-24	5.12883e-25	3.79196e-26	2.72779e-27	1.91062e-28	1.30394e-29	8.67654e-31	4
133		1.75032	7.08069	14.322	19.3126	19.5317	15.8026	10.6546	6.15739	3.11362	1.39953	0.566161	0.208212	0.0701912	0.0218423	0.00631144	0.00170214	0.000430363	0.00010241	2.3016e-05	4.90044e-06	9.91206e-07	1.90943e-07	3.51107e-08	6.17547e-09	1.04092e-09	1.68436e-10	2.62072e-11	3.92659e-12	5.67305e-13	7.91365e-14	1.06712e-14	1.39255e-15	1.76043e-16	2.15806e-17	2.5677e-18	2.9678e-19	3.33496e-20	3.64626e-21	3.88171e-22	4.0264e-23	4.07207e-24	6
137		4.02824	12.9381	20.7775	22.2447	17.8616	11.4737	6.14196	2.81814	1.13143	0.403775	0.129686	0.0378664	0.0101351	0.00250402	0.000574466	0.000123006	2.46923e-05	4.66516e-06	8.32431e-07	1.40718e-07	2.25981e-08	3.45627e-09	5.0459e-10	7.04637e-11	9.42992e-12	1.2115e-12	1.49659e-13	1.7803e-14	2.04216e-15	2.26175e-16	2.42147e-17	2.50883e-18	2.51811e-19	2.45084e-20	2.31521e-21	2.1246e-22	1.89552e-23	1.64543e-24	1.39076e-25	1.14536e-26	9.19675e-28	5
139		11.4971	24.869	26.8969	19.3933	10.4873	4.53699	1.63564	0.505432	0.136661	0.0328454	0.00710473	0.0013971	0.000251836	4.19032e-05	6.47428e-06	9.33625e-07	1.26219e-07	1.60601e-08	1.92996e-09	2.19719e-10	2.37634e-11	2.44772e-12	2.40665e-13	2.26338e-14	2.03994e-15	1.76502e-16	1.46842e-17	1.17641e-18	9.08808e-20	6.7787e-21	4.88762e-22	3.41042e-23	2.30532e-24	1.51109e-25	9.61352e-27	5.94138e-28	3.56991e-29	2.08702e-30	1.188e-31	6.58907e-33	3.56317e-34	4
140		12.3782	25.861	27.0148	18.8134	9.82636	4.10591	1.4297	0.426709	0.111437	0.0258686	0.00540454	0.00102648	0.000178713	2.8721e-05	4.28606e-06	5.96971e-07	7.79506e-08	9.57981e-09	1.11191e-09	1.22265e-10	1.2772e-11	1.27065e-12	1.20668e-13	1.0961e-14	9.54166e-16	7.97389e-17	6.40742e-18	4.95799e-19	3.69942e-20	2.66515e-21	1.85604e-22	1.25087e-23	8.16673e-25	5.17035e-26	3.17708e-27	1.89647e-28	1.1006e-29	6.21461e-31	3.41678e-32	1.83037e-33	9.56015e-35	4
141		12.3434	25.823	27.0115	18.8364	9.85167	4.12203	1.43725	0.429541	0.112328	0.0261105	0.00546244	0.00103888	0.000181115	2.91463e-05	4.35539e-06	6.07445e-07	7.94252e-08	9.77419e-09	1.136e-09	1.25083e-10	1.30839e-11	1.30344e-12	1.23948e-13	1.12741e-14	9.8275e-16	8.22384e-17	6.61717e-18	5.1272e-19	3.83084e-20	2.76355e-21	1.92716e-22	1.30055e-23	8.50253e-25	5.39021e-26	3.31664e-27	1.98245e-28	1.15205e-29	6.51388e-31	3.58614e-32	1.92369e-33	1.00611e-34	4
146		12.5183	26.0127	27.027	18.7205	9.72523	4.04177	1.39979	0.415534	0.107934	0.0249206	0.00517845	0.000978248	0.000169398	2.70775e-05	4.01904e-06	5.56766e-07	7.23094e-08	8.83868e-09	1.02037e-09	1.11595e-10	1.15946e-11	1.14731e-12	1.08367e-13	9.79068e-15	8.47703e-16	7.04605e-17	5.63137e-18	4.33403e-19	3.21644e-20	2.30473e-21	1.5964e-22	1.07009e-23	6.94885e-25	4.37563e-26	2.67426e-27	1.58773e-28	9.16467e-30	5.14704e-31	2.81459e-32	1.49966e-33	7.79067e-35	4
147		12.695	26.2019	27.04	18.6032	9.59908	3.96244	1.36306	0.4019	0.103689	0.0237788	0.00490787	0.00092088	0.000158389	2.51468e-05	3.7073e-06	5.10116e-07	6.58039e-08	7.98924e-09	9.16084e-10	9.9514e-11	1.02697e-11	1.00935e-12	9.46934e-14	8.49756e-15	7.30778e-16	6.03321e-17	4.78936e-18	3.66114e-19	2.69874e-20	1.92072e-21	1.32144e-22	8.79806e-24	5.67466e-25	3.54918e-26	2.15453e-27	1.27053e-28	7.28428e-30	4.06338e-31	2.20702e-32	1.168e-33	6.0268e-35	4
153		12.695	26.2019	27.04	18.6032	9.59908	3.96244	1.36306	0.4019	0.103689	0.0237788	0.00490787	0.00092088	0.000158389	2.51468e-05	3.7073e-06	5.10116e-07	6.58039e-08	7.98924e-09	9.16084e-10	9.9514e-11	1.02697e-11	1.00935e-12	9.46934e-14	8.49756e-15	7.30778e-16	6.03321e-17	4.78936e-18	3.66114e-19	2.69874e-20	1.92072e-21	1.32144e-22	8.79806e-24	5.67466e-25	3.54918e-26	2.15453e-27	1.27053e-28	7.28428e-30	4.06338e-31	2.20702e-32	1.168e-33	6.0268e-35	4
157		12.695	26.2019	27.04	18.6032	9.59908	3.96244	1.36306	0.4019	0.103689	0.0237788	0.00490787	0.00092088	0.000158389	2.51468e-05	3.7073e-06	5.10116e-07	6.58039e-08	7.98924e-09	9.16084e-10	9.9514e-11	1.02697e-11	1.00935e-12	9.46934e-14	8.49756e-15	7.30778e-16	6.03321e-17	4.78936e-18	3.66114e-19	2.69874e-20	1.92072e-21	1.32144e-22	8.79806e-24	5.67466e-25	3.54918e-26	2.15453e-27	1.27053e-28	7.28428e-30	4.06338e-31	2.20702e-32	1.168e-33	6.0268e-35	4
163		13.054	26.5789	27.0584	18.3643	9.34776	3.80655	1.29174	0.375724	0.0956254	0.0216334	0.00440472	0.000815303	0.000138335	2.16662e-05	3.151e-06	4.27711e-07	5.44282e-08	6.51882e-09	7.37378e-10	7.90187e-11	8.0444e-12	7.79953e-13	7.21837e-14	6.39006e-15	5.4211e-16	4.41511e-17	3.4575e-18	2.6073e-19	1.89595e-20	1.33114e-21	9.03432e-23	5.93373e-24	3.77547e-25	2.32944e-26	1.39497e-27	8.11506e-29	4.58968e-30	2.52566e-31	1.35327e-32	7.06503e-34	3.59623e-35	4
165		13.4207	26.9537	27.0666	18.1199	9.0979	3.6544	1.22323	0.350958	0.0881068	0.0196613	0.00394872	0.000720954	0.000120662	1.86411e-05	2.67417e-06	3.58048e-07	4.49434e-08	5.3096e-09	5.92426e-10	6.26217e-11	6.28838e-12	6.01401e-13	5.49017e-14	4.79405e-15	4.01177e-16	3.22285e-17	2.4895e-18	1.85179e-19	1.32825e-20	9.19867e-22	6.15812e-23	3.98962e-24	2.50395e-25	1.5239e-26	9.00164e-28	5.16533e-29	2.88164e-30	1.56417e-31	8.26692e-33	4.25719e-34	2.13751e-35	4
166		13.4207	26.9537	27.0666	18.1199	9.0979	3.6544	1.22323	0.350958	0.0881068	0.0196613	0.00394872	0.000720954	0.000120662	1.86411e-05	2.67417e-06	3.58048e-07	4.49434e-08	5.3096e-09	5.92426e-10	6.26217e-11	6.28838e-12	6.01401e-13	5.49017e-14	4.79405e-15	4.01177e-16	3.22285e-17	2.4895e-18	1.85179e-19	1.32825e-20	9.19867e-22	6.15812e-23	3.98962e-24	2.50395e-25	1.5239e-26	9.00164e-28	5.16533e-29	2.88164e-30	1.56417e-31	8.26692e-33	4.25719e-34	2.13751e-35	4
169		13.4207	26.9537	27.0666	18.1199	9.0979	3.6544	1.22323	0.350958	0.0881068	0.0196613	0.00394872	0.000720954	0.000120662	1.86411e-05	2.67417e-06	3.58048e-07	4.49434e-08	5.3096e-09	5.92426e-10	6.26217e-11	6.28838e-12	6.01401e-13	5.49017e-14	4.79405e-15	4.01177e-16	3.22285e-17	2.4895e-18	1.85179e-19	1.32825e-20	9.19867e-22	6.15812e-23	3.98962e-24	2.50395e-25	1.5239e-26	9.00164e-28	5.16533e-29	2.88164e-30	1.56417e-31	8.26692e-33	4.25719e-34	2.13751e-35	4
172		13.4207	26.9537	27.0666	18.1199	9.0979	3.6544	1.22323	0.350958	0.0881068	0.0196613	0.00394872	0.000720954	0.000120662	1.86411e-05	2.67417e-06	3.58048e-07	4.49434e-08	5.3096e-09	5.92426e-10	6.26217e-11	6.28838e-12	6.01401e-13	5.49017e-14	4.79405e-15	4.01177e-16	3.22285e-17	2.4895e-18	1.85179e-19	1.32825e-20	9.19867e-22	6.15812e-23	3.98962e-24	2.50395e-25	1.5239e-26	9.00164e-28	5.16533e-29	2.88164e-30	1.56417e-31	8.26692e-33	4.25719e-34	2.13751e-35	4
175		13.795	27.326	27.0646	17.8704	8.84969	3.506	1.15748	0.327545	0.0811027	0.0178504	0.00353591	0.000636741	0.000105108	1.60157e-05	2.26607e-06	2.99251e-07	3.70484e-08	4.31693e-09	4.75069e-10	4.95287e-11	4.90548e-12	4.62718e-13	4.16627e-14	3.58818e-15	2.96154e-16	2.34656e-17	1.78777e-18	1.3116e-19	9.27894e-21	6.33804e-22	4.18492e-23	2.67412e-24	1.65533e-25	9.9363e-27	5.78895e-28	3.27632e-29	1.80276e-30	9.65139e-32	5.03107e-33	2.55535e-34	1.26545e-35	3
182		10.5412	23.7164	26.6795	20.0086	11.2543	5.06415	1.89896	0.610347	0.171651	0.0429106	0.00965438	0.00197466	0.000370229	6.40747e-05	1.02972e-05	1.5445e-06	2.17184e-07	2.87434e-08	3.59274e-09	4.25434e-10	4.78588e-11	5.12746e-12	5.24372e-13	5.12946e-14	4.80862e-15	4.32753e-16	3.74479e-17	3.12049e-18	2.50741e-19	1.9453e-20	1.4589e-21	1.05882e-22	7.44447e-24	5.07551e-25	3.35862e-26	2.159e-27	1.3493e-28	8.2048e-30	4.85786e-31	2.80246e-32	1.5763e-33	4
193		12.695	26.2019	27.04	18.6032	9.59908	3.96244	1.36306	0.4019	0.103689	0.0237788	0.00490787	0.00092088	0.000158389	2.51468e-05	3.7073e-06	5.10116e-07	6.58039e-08	7.98924e-09	9.16084e-10	9.9514e-11	1.02697e-11	1.00935e-12	9.46934e-14	8.49756e-15	7.30778e-16	6.03321e-17	4.78936e-18	3.66114e-19	2.69874e-20	1.92072e-21	1.32144e-22	8.79806e-24	5.67466e-25	3.54918e-26	2.15453e-27	1.27053e-28	7.28428e-30	4.06338e-31	2.20702e-32	1.168e-33	6.0268e-35	4
195		13.2364	26.7666	27.0637	18.2428	9.22264	3.73	1.25714	0.363169	0.0918	0.0206264	0.00417108	0.000766796	0.000129218	2.01004e-05	2.90335e-06	3.91411e-07	4.94694e-08	5.88454e-09	6.61095e-10	7.03614e-11	7.11424e-12	6.85068e-13	6.29702e-14	5.53645e-15	4.66492e-16	3.77336e-17	2.93481e-18	2.19806e-19	1.58747e-20	1.10696e-21	7.46165e-23	4.86741e-24	3.0759e-25	1.88487e-26	1.12106e-27	6.47714e-29	3.63835e-30	1.98851e-31	1.0582e-32	5.48691e-34	2.77391e-35	4
197		13.795	27.326	27.0646	17.8704	8.84969	3.506	1.15748	0.327545	0.0811027	0.0178504	0.00353591	0.000636741	0.000105108	1.60157e-05	2.26607e-06	2.99251e-07	3.70484e-08	4.31693e-09	4.75069e-10	4.95287e-11	4.90548e-12	4.62718e-13	4.16627e-14	3.58818e-15	2.96154e-16	2.34656e-17	1.78777e-18	1.3116e-19	9.27894e-21	6.33804e-22	4.18492e-23	2.67412e-24	1.65533e-25	9.9363e-27	5.78895e-28	3.27632e-29	1.80276e-30	9.65139e-32	5.03107e-33	2.55535e-34	1.26545e-35	3
205		17.5206	30.5172	26.5774	15.4308	6.71932	2.34073	0.679513	0.169082	0.0368132	0.00712457	0.00124095	0.000196499	2.85217e-05	3.82146e-06	4.75443e-07	5.52083e-08	6.0101e-09	6.15786e-10	5.95874e-11	5.46258e-12	4.75735e-13	3.94587e-14	3.12404e-15	2.36584e-16	1.71701e-17	1.19627e-18	8.01406e-20	5.16994e-21	3.21607e-22	1.93163e-23	1.1215e-24	6.30137e-26	3.42991e-27	1.81036e-28	9.27435e-30	4.61543e-31	2.23309e-32	1.05124e-33	4.81855e-35	2.15203e-36	9.37099e-38	3
208		17.9751	30.8486	26.4709	15.1429	6.497	2.23001	0.637849	0.156381	0.0335472	0.006397	0.00109784	0.000171281	2.44958e-05	3.23379e-06	3.96412e-07	4.53543e-08	4.86476e-09	4.91106e-10	4.68237e-11	4.22937e-12	3.62918e-13	2.96587e-14	2.31362e-15	1.72635e-16	1.23447e-17	8.47427e-19	5.59361e-20	3.55542e-21	2.1792e-22	1.28962e-23	7.3774e-25	4.08418e-26	2.19037e-27	1.13911e-28	5.74978e-30	2.81933e-31	1.34402e-32	6.23401e-34	2.81545e-35	1.23893e-36	5.31556e-38	3
232		12.695	26.2019	27.04	18.6032	9.59908	3.96244	1.36306	0.4019	0.103689	0.0237788	0.00490787	0.00092088	0.000158389	2.51468e-05	3.7073e-06	5.10116e-07	6.58039e-08	7.98924e-09	9.16084e-10	9.9514e-11	1.02697e-11	1.00935e-12	9.46934e-14	8.49756e-15	7.30778e-16	6.03321e-17	4.78936e-18	3.66114e-19	2.69874e-20	1.92072e-21	1.32144e-22	8.79806e-24	5.67466e-25	3.54918e-26	2.15453e-27	1.27053e-28	7.28428e-30	4.06338e-31	2.20702e-32	1.168e-33	6.0268e-35	4
238		21.7816	33.1975	25.2982	12.8523	4.89707	1.49273	0.379179	0.0825583	0.0157284	0.00266353	0.000405949	5.62462e-05	7.14375e-06	8.37524e-07	9.11767e-08	9.26418e-09	8.82473e-10	7.91164e-11	6.69898e-12	5.37365e-13	4.095e-14	2.972e-15	2.05893e-16	1.36435e-17	8.66424e-19	5.28208e-20	3.09632e-21	1.74782e-22	9.51378e-24	4.99999e-25	2.54017e-26	1.24886e-27	5.94812e-29	2.74714e-30	1.23145e-31	5.36243e-33	2.27025e-34	9.35161e-36	3.75074e-37	1.46577e-38	5.58498e-40	3
237		9.50538	22.3691	26.3208	20.647	12.1472	5.71724	2.24241	0.753869	0.221761	0.0579859	0.0136459	0.00291937	0.000572516	0.000103639	1.74211e-05	2.73315e-06	4.01997e-07	5.56486e-08	7.27547e-09	9.01129e-10	1.06032e-10	1.18822e-11	1.27102e-12	1.30049e-13	1.27519e-14	1.20037e-15	1.08647e-16	9.46968e-18	7.95897e-19	6.4586e-20	5.06637e-21	3.84605e-22	2.82842e-23	2.01702e-24	1.39608e-25	9.3869e-27	6.1362e-28	3.90281e-29	2.41698e-30	1.45844e-31	8.58041e-33	4
239		13.6069	27.1402	27.0669	17.9958	8.97358	3.57973	1.19002	0.339086	0.0845423	0.0187364	0.00373715	0.000677645	0.000112636	1.72817e-05	2.46214e-06	3.27398e-07	4.08142e-08	4.78869e-09	5.30638e-10	5.57057e-11	5.55551e-12	5.27666e-13	4.784e-14	4.14875e-15	3.44795e-16	2.7509e-17	2.11036e-18	1.559e-19	1.11056e-20	7.63836e-22	5.07847e-23	3.26758e-24	2.03672e-25	1.23104e-26	7.22182e-28	4.1156e-29	2.28026e-30	1.22924e-31	6.45221e-33	3.29988e-34	1.64548e-35	3
243		4.70445	14.3799	21.9773	22.3923	17.1115	10.4608	5.32918	2.32707	0.889134	0.301976	0.0923038	0.0256492	0.00653342	0.00153619	0.0003354	6.8347e-05	1.30571e-05	2.34772e-06	3.98676e-07	6.41378e-08	9.80238e-09	1.42679e-09	1.98237e-10	2.63453e-11	3.35537e-12	4.10249e-13	4.82305e-14	5.46016e-15	5.96066e-16	6.28266e-17	6.40133e-18	6.31184e-19	6.02911e-20	5.58453e-21	5.02059e-22	4.38464e-23	3.72288e-24	3.07556e-25	2.47394e-26	1.93897e-27	1.48169e-28	5
239		5.11951	15.2158	22.6115	22.4013	16.6448	9.89401	4.90102	2.08091	0.773087	0.2553	0.075878	0.0205016	0.00507776	0.0011609	0.000246451	4.8832e-05	9.07087e-06	1.58586e-06	2.61853e-07	4.09609e-08	6.08701e-09	8.61489e-10	1.16384e-10	1.50394e-11	1.86244e-12	2.21416e-13	2.53104e-14	2.78613e-15	2.95739e-16	3.03092e-17	3.00275e-18	2.87887e-19	2.67385e-20	2.40818e-21	2.10511e-22	1.7876e-23	1.47582e-24	1.18549e-25	9.27211e-27	7.06608e-28	5.2503e-29	4

## Sheet: 0.45 mL.min
0.45 mL/min
	/collision	0	1	2	3	4	5	6	7	8	9	10	11	12	13	14	15	16	17	18	19	20	21	22	23	24	25	26	27	28	29	30	31	32	33	34	35	36	37	38	39	40	j
mass/
9		8.67939	21.2143	25.9262	21.1231	12.9074	6.3097	2.57038	0.897511	0.274214	0.0744711	0.0182024	0.0040446	0.000823824	0.000154893	2.70423e-05	4.40648e-06	6.73151e-07	9.6784e-08	1.31423e-08	1.69067e-09	2.06618e-10	2.40486e-11	2.67182e-12	2.83935e-13	2.89166e-14	2.82715e-15	2.65776e-16	2.40598e-17	2.10026e-18	1.77017e-19	1.44223e-20	1.13714e-21	8.68567e-23	6.43324e-24	4.62478e-25	3.22971e-26	2.19281e-27	1.44857e-28	9.31742e-30	5.83944e-31	3.56822e-32	4
11		14.4353	27.9395	27.0383	17.4441	8.44074	3.2674	1.054	0.29143	0.0705076	0.015163	0.00293478	0.000516386	8.32884e-05	1.24003e-05	1.71433e-06	2.21205e-07	2.67588e-08	3.04655e-09	3.27588e-10	3.33707e-11	3.22943e-12	2.97645e-13	2.61859e-14	2.20359e-15	1.77709e-16	1.37582e-17	1.02419e-18	7.34187e-20	5.07505e-21	3.38714e-22	2.18526e-23	1.36437e-24	8.25228e-26	4.84007e-27	2.75527e-28	1.52366e-29	8.19173e-31	4.28514e-32	2.18259e-33	1.08318e-34	5.2412e-36	3
23		1.21244	5.34994	11.8034	17.361	19.1515	16.9013	12.4296	7.83514	4.32161	2.1188	0.93493	0.375037	0.137905	0.0468087	0.0147532	0.00433993	0.00119688	0.000310664	7.61564e-05	1.76865e-05	3.9021e-06	8.19913e-07	1.6445e-07	3.15496e-08	5.80057e-09	1.02381e-09	1.73753e-10	2.8396e-11	4.47495e-12	6.80892e-13	1.00149e-13	1.42551e-14	1.96567e-15	2.62835e-16	3.41109e-17	4.30044e-18	5.27107e-19	6.28616e-20	7.29945e-21	8.25873e-22	9.11049e-23	6
24		4.04969	12.9855	20.8191	22.2524	17.8382	11.4398	6.11365	2.80051	1.12249	0.399922	0.128236	0.0373812	0.00998866	0.00246376	0.000564295	0.000120629	2.41749e-05	4.55986e-06	8.12296e-07	1.37087e-07	2.19786e-08	3.35596e-09	4.89136e-10	6.81925e-11	9.11089e-12	1.16857e-12	1.44118e-13	1.71155e-14	1.96005e-15	2.16722e-16	2.31642e-17	2.39602e-18	2.40091e-19	2.33291e-20	2.20016e-21	2.01568e-22	1.79537e-23	1.55592e-24	1.31292e-25	1.07947e-26	8.65334e-28	5
27		7.61434	19.608	25.2466	21.6712	13.9515	7.18543	3.08391	1.1345	0.365186	0.104489	0.0269074	0.00629912	0.00135176	0.000267766	4.92525e-05	8.45546e-06	1.36087e-06	2.06143e-07	2.94915e-08	3.99709e-09	5.14652e-10	6.31095e-11	7.38708e-12	8.27076e-13	8.8743e-14	9.14102e-15	9.0536e-16	8.63492e-17	7.94146e-18	7.05184e-19	6.05315e-20	5.02829e-21	4.04642e-22	3.1576e-23	2.39154e-24	1.75959e-25	1.25866e-26	8.76006e-28	5.93641e-29	3.91976e-30	2.52348e-31	4
39		0.228975	1.39201	4.23123	8.57433	13.0315	15.8445	16.054	13.9424	10.5951	7.15674	4.35081	2.40454	1.21816	0.569661	0.247368	0.100255	0.0380926	0.0136222	0.00460075	0.00147207	0.00044746	0.000129536	3.57949e-05	9.46123e-06	2.39657e-06	5.82781e-07	1.36266e-07	3.06815e-08	6.66153e-09	1.39647e-09	2.82985e-10	5.54953e-11	1.05429e-11	1.94223e-12	3.47278e-13	6.03203e-14	1.01863e-14	1.67366e-15	2.67756e-16	4.17378e-17	6.34343e-18	8
40		1.07911	4.88733	11.0674	16.7083	18.9181	17.1361	12.935	8.369	4.73794	2.38425	1.07984	0.444601	0.167801	0.0584597	0.0189118	0.00571016	0.00161634	0.000430616	0.000108349	2.58271e-05	5.84858e-06	1.26135e-06	2.59668e-07	5.11325e-08	9.64919e-09	1.74806e-09	3.04501e-10	5.10776e-11	8.26186e-12	1.29028e-12	1.94791e-13	2.84586e-14	4.0278e-15	5.5279e-16	7.36354e-17	9.52848e-18	1.19874e-18	1.46734e-19	1.74885e-20	2.03092e-21	2.29953e-22	6
51		2.06529	8.01311	15.545	20.1044	19.5008	15.1322	9.78524	5.42368	2.63042	1.13397	0.43997	0.155185	0.0501753	0.014975	0.00415011	0.00107347	0.000260309	5.94103e-05	1.28059e-05	2.61503e-06	5.07303e-07	9.37278e-08	1.65297e-08	2.78842e-09	4.50784e-10	6.99598e-11	1.04399e-11	1.50021e-12	2.07881e-13	2.78124e-14	3.59697e-15	4.5019e-16	5.45841e-17	6.41761e-18	7.32343e-19	8.11834e-20	8.74954e-21	9.17496e-22	9.36787e-23	9.31959e-24	9.03977e-25	5
52		2.36256	8.84879	16.5712	20.6888	19.3721	14.5113	9.05851	4.84685	2.26919	0.944343	0.353696	0.120431	0.0375888	0.0108297	0.00289728	0.000723435	0.000169348	3.73107e-05	7.76357e-06	1.53041e-06	2.86603e-07	5.11166e-08	8.70243e-09	1.41714e-09	2.21159e-10	3.31333e-11	4.77301e-12	6.6211e-13	8.85672e-14	1.14387e-14	1.42809e-15	1.72542e-16	2.01951e-17	2.2921e-18	2.52497e-19	2.70202e-20	2.81117e-21	2.84569e-22	2.80482e-23	2.69365e-24	2.52222e-25	5
55		2.69621	9.74229	17.601	21.1994	19.15	13.839	8.33416	4.302	1.94306	0.780101	0.281876	0.0925916	0.0278803	0.00774926	0.00200004	0.000481786	0.000108803	2.31259e-05	4.6423e-06	8.82848e-07	1.59501e-07	2.74442e-08	4.50748e-09	7.08129e-10	1.06612e-10	1.5409e-11	2.14145e-12	2.86583e-13	3.69828e-14	4.60795e-15	5.55001e-16	6.46902e-17	7.30458e-18	7.99812e-19	8.49993e-20	8.77514e-21	8.80761e-22	8.60128e-23	8.17874e-24	7.57754e-25	6.84502e-26	5
56		3.0697	10.6936	18.626	21.6285	18.8362	13.1235	7.61949	3.79188	1.65117	0.639111	0.22264	0.0705079	0.0204684	0.00548488	0.00136479	0.000316958	6.90096e-05	1.41412e-05	2.73679e-06	5.01782e-07	8.74002e-08	1.44984e-08	2.29575e-09	3.47715e-10	5.04707e-11	7.03278e-12	9.42281e-13	1.21575e-13	1.51256e-14	1.81695e-15	2.10983e-16	2.3709e-17	2.58101e-18	2.7246e-19	2.79159e-20	2.7785e-21	2.68865e-22	2.5314e-23	2.32062e-24	2.07284e-25	1.80523e-26	5
59		3.3996	11.4958	19.4366	21.9083	18.5208	12.5257	7.05929	3.41016	1.44144	0.541581	0.183136	0.056298	0.0158644	0.00412658	0.000996721	0.000224695	4.7488e-05	9.44596e-06	1.77454e-06	3.15822e-07	5.33978e-08	8.59834e-09	1.32161e-09	1.94306e-10	2.7377e-11	3.70303e-12	4.81609e-13	6.03173e-14	7.28442e-15	8.49392e-16	9.57409e-17	1.04435e-17	1.10359e-18	1.13085e-19	1.1247e-20	1.08663e-21	1.02068e-22	9.3282e-24	8.3009e-25	7.19733e-26	6.08447e-27	5
60		3.66644	12.1211	20.0358	22.0791	18.2481	12.0655	6.64798	3.1397	1.29746	0.476593	0.157559	0.047353	0.0130456	0.00331754	0.000783401	0.000172659	3.56751e-05	6.93766e-06	1.2742e-06	2.21707e-07	3.66476e-08	5.7693e-09	8.66955e-10	1.24614e-10	1.71653e-11	2.2699e-12	2.88622e-13	3.53396e-14	4.17254e-15	4.75662e-16	5.24172e-17	5.58996e-18	5.77504e-19	5.78545e-20	5.62542e-21	5.31353e-22	4.87952e-23	4.35985e-24	3.79301e-25	3.21526e-26	2.65737e-27	5
64		4.04969	12.9855	20.8191	22.2524	17.8382	11.4398	6.11365	2.80051	1.12249	0.399922	0.128236	0.0373812	0.00998866	0.00246376	0.000564295	0.000120629	2.41749e-05	4.55986e-06	8.12296e-07	1.37087e-07	2.19786e-08	3.35596e-09	4.89136e-10	6.81925e-11	9.11089e-12	1.16857e-12	1.44118e-13	1.71155e-14	1.96005e-15	2.16722e-16	2.31642e-17	2.39602e-18	2.40091e-19	2.33291e-20	2.20016e-21	2.01568e-22	1.79537e-23	1.55592e-24	1.31292e-25	1.07947e-26	8.65334e-28	5
66		4.35886	13.6561	21.3921	22.3401	17.4977	10.9639	5.72491	2.56227	1.00344	0.349303	0.109435	0.0311688	0.00813754	0.00196112	0.000438865	9.16631e-05	1.79485e-05	3.30777e-06	5.75728e-07	9.49332e-08	1.48711e-08	2.2186e-09	3.15944e-10	4.30365e-11	5.61799e-12	7.04037e-13	8.48354e-14	9.84392e-15	1.10145e-15	1.18993e-16	1.24267e-17	1.25588e-18	1.22957e-19	1.16733e-20	1.07565e-21	9.62844e-23	8.37931e-24	7.09514e-25	5.84968e-26	4.69918e-27	3.68059e-28	5
70		5.03689	15.0522	22.4908	22.4037	16.7377	10.0037	4.98248	2.12708	0.794565	0.263829	0.0788422	0.0214191	0.00533405	0.00122617	0.000261732	5.21437e-05	9.73908e-06	1.712e-06	2.84229e-07	4.47044e-08	6.67969e-09	9.50546e-10	1.29118e-10	1.67762e-11	2.08891e-12	2.49698e-13	2.86997e-14	3.17651e-15	3.39022e-16	3.49354e-17	3.48001e-18	3.35471e-19	3.13286e-20	2.83702e-21	2.49356e-22	2.12906e-23	1.76734e-24	1.42743e-25	1.12255e-26	8.60159e-28	6.4262e-29	4
75		8.31192	20.6757	25.7152	21.322	13.2595	6.59656	2.7348	0.971823	0.302174	0.0835167	0.0207746	0.00469786	0.000973818	0.000186335	3.31074e-05	5.49027e-06	8.53558e-07	1.24895e-07	1.72596e-08	2.25962e-09	2.81038e-10	3.32894e-11	3.76394e-12	4.07075e-13	4.21913e-14	4.198e-15	4.01632e-16	3.70019e-17	3.28719e-18	2.81959e-19	2.33789e-20	1.87596e-21	1.45825e-22	1.0992e-23	8.04189e-25	5.71544e-26	3.94917e-27	2.655e-28	1.73796e-29	1.1085e-30	6.89341e-32	4
78		10.4953	23.6589	26.6665	20.0376	11.2924	5.09119	1.9128	0.615989	0.173574	0.0434754	0.00980042	0.00200841	0.000377289	6.54232e-05	1.05343e-05	1.58313e-06	2.23047e-07	2.95767e-08	3.70406e-09	4.39467e-10	4.95334e-11	5.31716e-12	5.44827e-13	5.33989e-14	5.0156e-15	4.52256e-16	3.92114e-17	3.27378e-18	2.63568e-19	2.04879e-20	1.53949e-21	1.11948e-22	7.88621e-24	5.38711e-25	3.57173e-26	2.30044e-27	1.44049e-28	8.77628e-30	5.20629e-31	3.0093e-32	1.69592e-33	4
85		0.106004	0.726068	2.48658	5.67724	9.7215	13.3174	15.2028	14.8758	12.7364	9.69304	6.6392	4.13408	2.35968	1.24327	0.608265	0.277752	0.118903	0.0479071	0.0182298	0.00657181	0.00225066	0.000734086	0.000228549	6.80625e-05	1.94246e-05	5.32192e-06	1.40201e-06	3.55666e-07	8.70041e-08	2.05493e-08	4.69172e-09	1.03664e-09	2.21887e-10	4.60546e-11	9.27791e-12	1.81567e-12	3.45454e-13	6.39506e-14	1.1527e-14	2.02445e-15	3.4666e-16	8
88		0.503404	2.66378	7.04774	12.4311	16.4449	17.4037	15.3487	11.6026	7.67446	4.51218	2.38764	1.14857	0.506474	0.206156	0.0779199	0.0274877	0.00909075	0.00282965	0.000831843	0.00023167	6.12944e-05	1.54448e-05	3.71485e-06	8.54663e-07	1.88437e-07	3.98847e-08	8.11736e-09	1.59086e-09	3.00646e-10	5.48579e-11	9.67607e-12	1.65165e-12	2.73118e-13	4.37943e-14	6.81585e-15	1.03047e-15	1.51465e-16	2.16617e-17	3.01641e-18	4.09267e-19	5.41413e-20	7
95		1.21244	5.34994	11.8034	17.361	19.1515	16.9013	12.4296	7.83514	4.32161	2.1188	0.93493	0.375037	0.137905	0.0468087	0.0147532	0.00433993	0.00119688	0.000310664	7.61564e-05	1.76865e-05	3.9021e-06	8.19913e-07	1.6445e-07	3.15496e-08	5.80057e-09	1.02381e-09	1.73753e-10	2.8396e-11	4.47495e-12	6.80892e-13	1.00149e-13	1.42551e-14	1.96567e-15	2.62835e-16	3.41109e-17	4.30044e-18	5.27107e-19	6.28616e-20	7.29945e-21	8.25873e-22	9.11049e-23	6
106		2.18004	8.34046	15.9546	20.3465	19.4605	14.8905	9.49475	5.18932	2.48168	1.05494	0.403602	0.140374	0.0447538	0.0131708	0.00359922	0.000918	0.000219507	4.93997e-05	1.04997e-05	2.11421e-06	4.0443e-07	7.368e-08	1.2813e-08	2.13132e-09	3.39753e-10	5.19934e-11	7.65068e-12	1.08408e-12	1.48125e-13	1.95414e-14	2.49207e-15	3.07555e-16	3.67704e-17	4.26294e-18	4.79685e-19	5.2434e-20	5.57231e-21	5.76181e-22	5.80097e-23	5.69064e-24	5.44285e-25	5
107		2.42627	9.02285	16.7772	20.797	19.3351	14.3807	8.91321	4.73522	2.20118	0.90953	0.338237	0.114349	0.035437	0.0101372	0.00269274	0.000667587	0.000155164	3.39428e-05	7.01261e-06	1.37256e-06	2.55215e-07	4.5195e-08	7.63963e-09	1.23523e-09	1.914e-10	2.84713e-11	4.07229e-12	5.60892e-13	7.44947e-14	9.55283e-15	1.18417e-15	1.42056e-16	1.65087e-17	1.86039e-18	2.03483e-19	2.16205e-20	2.23341e-21	2.24476e-22	2.1968e-23	2.09475e-24	1.94749e-25	5
114		3.14949	10.8907	18.8297	21.7039	18.7626	12.976	7.47832	3.69422	1.59679	0.61351	0.212147	0.0666901	0.0192175	0.00511174	0.00126257	0.000291059	6.29039e-05	1.27951e-05	2.45803e-06	4.47353e-07	7.73457e-08	1.2736e-08	2.00183e-09	3.00964e-10	4.3363e-11	5.99784e-12	7.97697e-13	1.02162e-13	1.26168e-14	1.50441e-15	1.73405e-16	1.93426e-17	2.09017e-18	2.1902e-19	2.22751e-20	2.20074e-21	2.11389e-22	1.97559e-23	1.79775e-24	1.59397e-25	1.37796e-26	5
115		0.48768	2.59605	6.90974	12.2608	16.3169	17.3718	15.4124	11.7206	7.79901	4.61291	2.45558	1.18833	0.527152	0.215859	0.0820768	0.0291278	0.00969092	0.00303455	0.000897429	0.000251434	6.69226e-05	1.69641e-05	4.10475e-06	9.50029e-07	2.10719e-07	4.48685e-08	9.18643e-09	1.81118e-09	3.44335e-10	6.32064e-11	1.12155e-11	1.9259e-12	3.20378e-13	5.16805e-14	8.09144e-15	1.23065e-15	1.81975e-16	2.61811e-17	3.6676e-18	5.00606e-19	6.66214e-20	7
133		0.0306361	0.247869	1.00272	2.70426	5.46987	8.85106	11.9353	13.795	13.9515	12.542	10.1474	7.46367	5.03222	3.13188	1.80994	0.976254	0.493664	0.234948	0.105606	0.0449699	0.018192	0.0070089	0.0025776	0.000906727	0.000305671	9.89242e-05	3.07835e-05	9.22449e-06	2.66546e-06	7.43641e-07	2.00554e-07	5.23429e-08	1.32342e-08	3.24467e-09	7.72113e-10	1.78485e-10	4.01132e-11	8.77151e-12	1.86758e-12	3.87439e-13	7.83667e-14	10
137		0.162267	1.04235	3.34787	7.16854	11.5121	14.79	15.8344	14.5308	11.6676	8.32768	5.34944	3.12392	1.67225	0.82631	0.37914	0.162365	0.0651863	0.0246315	0.00879028	0.00297189	0.000954525	0.000291979	8.52538e-05	2.38106e-05	6.37299e-06	1.63752e-06	4.04574e-07	9.62539e-08	2.20823e-08	4.89137e-09	1.04735e-09	2.17028e-10	4.35662e-11	8.48047e-12	1.60223e-12	2.94064e-13	5.24714e-14	9.10972e-15	1.53995e-15	2.53644e-16	4.07333e-17	8
139		1.32182	5.71842	12.3694	17.8373	19.2918	16.6918	12.0353	7.43806	4.02228	1.93344	0.836439	0.328961	0.118595	0.0394661	0.0121955	0.0035173	0.000951025	0.000242017	5.81668e-05	1.32441e-05	2.86481e-06	5.90173e-07	1.16054e-07	2.1829e-08	3.93482e-09	6.80906e-10	1.13296e-10	1.81533e-11	2.80478e-12	4.18411e-13	6.03371e-14	8.42025e-15	1.13835e-15	1.49233e-16	1.89884e-17	2.34706e-18	2.82048e-19	3.2978e-20	3.75442e-21	4.16467e-22	4.50426e-23	6
140		1.53221	6.40227	13.3758	18.6301	19.4613	16.2636	11.3262	6.76085	3.53124	1.63946	0.685042	0.26022	0.09061	0.0291239	0.00869235	0.00242138	0.000632351	0.000155427	3.60803e-05	7.93473e-06	1.65775e-06	3.29849e-07	6.26483e-08	1.13814e-08	1.98154e-09	3.31191e-10	5.32258e-11	8.2371e-12	1.22923e-12	1.77113e-13	2.46687e-14	3.32507e-15	4.34177e-16	5.49755e-17	6.75626e-18	8.06593e-19	9.36199e-20	1.05726e-20	1.16256e-21	1.24557e-22	1.30114e-23	6
141		1.5236	6.37489	13.3366	18.6005	19.4565	16.2816	11.354	6.78657	3.54946	1.65014	0.690434	0.262622	0.0915695	0.029472	0.0088081	0.00245693	0.000642501	0.000158134	3.67583e-05	8.09474e-06	1.69346e-06	3.37409e-07	6.41704e-08	1.16737e-08	2.03516e-09	3.40612e-10	5.48136e-11	8.49426e-12	1.26931e-12	1.83135e-13	2.55419e-14	3.4474e-15	4.50758e-16	5.71519e-17	7.03321e-18	8.40789e-19	9.77205e-20	1.10506e-20	1.21675e-21	1.30539e-22	1.36547e-23	6
146		1.56707	6.51267	13.5332	18.7479	19.4789	16.1907	11.2147	6.65825	3.45893	1.59724	0.663809	0.250797	0.0868587	0.0277678	0.008243	0.00228384	0.000593223	0.000145024	3.34842e-05	7.32418e-06	1.52195e-06	3.01199e-07	5.68987e-08	1.02813e-08	1.78036e-09	2.95964e-10	4.73083e-11	7.28192e-12	1.08084e-12	1.54894e-13	2.14577e-14	2.8767e-15	3.73608e-16	4.70516e-17	5.75132e-18	6.82922e-19	7.88389e-20	8.85545e-21	9.68499e-22	1.03206e-22	1.0723e-23	6
147		1.61162	6.65265	13.7308	18.8933	19.4976	16.0969	11.0745	6.53069	3.36978	1.54558	0.638005	0.239422	0.0823598	0.026152	0.00771097	0.00212202	0.000547473	0.000132937	3.04864e-05	6.62346e-06	1.36706e-06	2.6872e-07	5.04209e-08	9.04931e-09	1.55645e-09	2.56998e-10	4.08026e-11	6.23817e-12	9.19669e-13	1.30908e-13	1.80126e-14	2.39855e-15	3.09407e-16	3.87034e-17	4.69897e-18	5.54201e-19	6.35473e-20	7.0897e-21	7.70153e-22	8.15164e-23	8.41235e-24	6
153		1.61162	6.65265	13.7308	18.8933	19.4976	16.0969	11.0745	6.53069	3.36978	1.54558	0.638005	0.239422	0.0823598	0.026152	0.00771097	0.00212202	0.000547473	0.000132937	3.04864e-05	6.62346e-06	1.36706e-06	2.6872e-07	5.04209e-08	9.04931e-09	1.55645e-09	2.56998e-10	4.08026e-11	6.23817e-12	9.19669e-13	1.30908e-13	1.80126e-14	2.39855e-15	3.09407e-16	3.87034e-17	4.69897e-18	5.54201e-19	6.35473e-20	7.0897e-21	7.70153e-22	8.15164e-23	8.41235e-24	6
157		1.61162	6.65265	13.7308	18.8933	19.4976	16.0969	11.0745	6.53069	3.36978	1.54558	0.638005	0.239422	0.0823598	0.026152	0.00771097	0.00212202	0.000547473	0.000132937	3.04864e-05	6.62346e-06	1.36706e-06	2.6872e-07	5.04209e-08	9.04931e-09	1.55645e-09	2.56998e-10	4.08026e-11	6.23817e-12	9.19669e-13	1.30908e-13	1.80126e-14	2.39855e-15	3.09407e-16	3.87034e-17	4.69897e-18	5.54201e-19	6.35473e-20	7.0897e-21	7.70153e-22	8.15164e-23	8.41235e-24	6
163		1.70407	6.93924	14.1288	19.1782	19.5241	15.901	10.7919	6.27803	3.19563	1.4459	0.588792	0.217968	0.0739666	0.0231695	0.00673925	0.00182955	0.000465637	0.000111538	2.52333e-05	5.40809e-06	1.10113e-06	2.13522e-07	3.95224e-08	6.99744e-09	1.18728e-09	1.93391e-10	3.0289e-11	4.5682e-12	6.64372e-13	9.32904e-14	1.26631e-14	1.66342e-15	2.11678e-16	2.61207e-17	3.12845e-18	3.63987e-19	4.11724e-20	4.53136e-21	4.85589e-22	5.07023e-23	5.16169e-24	6
165		1.80115	7.23475	14.5301	19.4545	19.536	15.6942	10.5066	6.02892	3.02708	1.351	0.542663	0.198158	0.0663293	0.0204945	0.00588008	0.00157459	0.000395294	9.33999e-05	2.08424e-05	4.40625e-06	8.84939e-07	1.69266e-07	3.09044e-08	5.39718e-09	9.03296e-10	1.45133e-10	2.24216e-11	3.33562e-12	4.78512e-13	6.6278e-14	8.87407e-15	1.14983e-15	1.44331e-16	1.75679e-17	2.07547e-18	2.38189e-19	2.65763e-20	2.88514e-21	3.04971e-22	3.141e-23	3.15415e-24	6
166		1.80115	7.23475	14.5301	19.4545	19.536	15.6942	10.5066	6.02892	3.02708	1.351	0.542663	0.198158	0.0663293	0.0204945	0.00588008	0.00157459	0.000395294	9.33999e-05	2.08424e-05	4.40625e-06	8.84939e-07	1.69266e-07	3.09044e-08	5.39718e-09	9.03296e-10	1.45133e-10	2.24216e-11	3.33562e-12	4.78512e-13	6.6278e-14	8.87407e-15	1.14983e-15	1.44331e-16	1.75679e-17	2.07547e-18	2.38189e-19	2.65763e-20	2.88514e-21	3.04971e-22	3.141e-23	3.15415e-24	6
169		1.80115	7.23475	14.5301	19.4545	19.536	15.6942	10.5066	6.02892	3.02708	1.351	0.542663	0.198158	0.0663293	0.0204945	0.00588008	0.00157459	0.000395294	9.33999e-05	2.08424e-05	4.40625e-06	8.84939e-07	1.69266e-07	3.09044e-08	5.39718e-09	9.03296e-10	1.45133e-10	2.24216e-11	3.33562e-12	4.78512e-13	6.6278e-14	8.87407e-15	1.14983e-15	1.44331e-16	1.75679e-17	2.07547e-18	2.38189e-19	2.65763e-20	2.88514e-21	3.04971e-22	3.141e-23	3.15415e-24	6
172		1.80115	7.23475	14.5301	19.4545	19.536	15.6942	10.5066	6.02892	3.02708	1.351	0.542663	0.198158	0.0663293	0.0204945	0.00588008	0.00157459	0.000395294	9.33999e-05	2.08424e-05	4.40625e-06	8.84939e-07	1.69266e-07	3.09044e-08	5.39718e-09	9.03296e-10	1.45133e-10	2.24216e-11	3.33562e-12	4.78512e-13	6.6278e-14	8.87407e-15	1.14983e-15	1.44331e-16	1.75679e-17	2.07547e-18	2.38189e-19	2.65763e-20	2.88514e-21	3.04971e-22	3.141e-23	3.15415e-24	6
175		1.90303	7.53927	14.9343	19.7218	19.5331	15.4769	10.2192	5.78368	2.86417	1.26078	0.499487	0.179893	0.0593907	0.0180992	0.00512171	0.00135272	0.000334944	7.80562e-05	1.71798e-05	3.5822e-06	7.09584e-07	1.33866e-07	2.41063e-08	4.15228e-09	6.85424e-10	1.08618e-10	1.65506e-11	2.42848e-12	3.43606e-13	4.69404e-14	6.19884e-15	7.92196e-16	9.80769e-17	1.17744e-17	1.37196e-18	1.55295e-19	1.70899e-20	1.82988e-21	1.90776e-22	1.93795e-23	1.91941e-24	5
182		1.11116	4.99996	11.2493	16.8731	18.9813	17.0822	12.811	8.23522	4.63207	2.31592	1.04211	0.426295	0.159852	0.0553306	0.0177839	0.00533489	0.00150036	0.000397133	9.92782e-05	2.3512e-05	5.28993e-06	1.1335e-06	2.3184e-07	4.53576e-08	8.50411e-09	1.53066e-09	2.64908e-10	4.4149e-11	7.09501e-12	1.10089e-12	1.65125e-13	2.39686e-14	3.3704e-15	4.59577e-16	6.08231e-17	7.81971e-18	9.77413e-19	1.18868e-19	1.40758e-20	1.62404e-21	1.82696e-22	6
193		1.61162	6.65265	13.7308	18.8933	19.4976	16.0969	11.0745	6.53069	3.36978	1.54558	0.638005	0.239422	0.0823598	0.026152	0.00771097	0.00212202	0.000547473	0.000132937	3.04864e-05	6.62346e-06	1.36706e-06	2.6872e-07	5.04209e-08	9.04931e-09	1.55645e-09	2.56998e-10	4.08026e-11	6.23817e-12	9.19669e-13	1.30908e-13	1.80126e-14	2.39855e-15	3.09407e-16	3.87034e-17	4.69897e-18	5.54201e-19	6.35473e-20	7.0897e-21	7.70153e-22	8.15164e-23	8.41235e-24	6
195		1.75202	7.08587	14.3291	19.3175	19.5319	15.799	10.6496	6.15301	3.11066	1.39786	0.565351	0.207864	0.0700571	0.0217953	0.00629636	0.00169767	0.000429128	0.000102092	2.29389e-05	4.88286e-06	9.87411e-07	1.90166e-07	3.49594e-08	6.14739e-09	1.03594e-09	1.6759e-10	2.60693e-11	3.90498e-12	5.64047e-13	7.86632e-14	1.06048e-14	1.38356e-15	1.74864e-16	2.14309e-17	2.54927e-18	2.9458e-19	3.30944e-20	3.61749e-21	3.85015e-22	3.9927e-23	4.03702e-24	6
197		1.90303	7.53927	14.9343	19.7218	19.5331	15.4769	10.2192	5.78368	2.86417	1.26078	0.499487	0.179893	0.0593907	0.0180992	0.00512171	0.00135272	0.000334944	7.80562e-05	1.71798e-05	3.5822e-06	7.09584e-07	1.33866e-07	2.41063e-08	4.15228e-09	6.85424e-10	1.08618e-10	1.65506e-11	2.42848e-12	3.43606e-13	4.69404e-14	6.19884e-15	7.92196e-16	9.80769e-17	1.17744e-17	1.37196e-18	1.55295e-19	1.70899e-20	1.82988e-21	1.90776e-22	1.93795e-23	1.91941e-24	5
205		3.0697	10.6936	18.626	21.6285	18.8362	13.1235	7.61949	3.79188	1.65117	0.639111	0.22264	0.0705079	0.0204684	0.00548488	0.00136479	0.000316958	6.90096e-05	1.41412e-05	2.73679e-06	5.01782e-07	8.74002e-08	1.44984e-08	2.29575e-09	3.47715e-10	5.04707e-11	7.03278e-12	9.42281e-13	1.21575e-13	1.51256e-14	1.81695e-15	2.10983e-16	2.3709e-17	2.58101e-18	2.7246e-19	2.79159e-20	2.7785e-21	2.68865e-22	2.5314e-23	2.32062e-24	2.07284e-25	1.80523e-26	5
208		3.23105	11.0901	19.0327	21.7757	18.6855	12.8271	7.33787	3.59803	1.54372	0.588733	0.202075	0.0630539	0.0180353	0.00476183	0.00116745	0.000267141	5.73077e-05	1.15706e-05	2.20637e-06	3.98582e-07	6.84038e-08	1.11803e-08	1.74431e-09	2.60309e-10	3.72282e-11	5.11122e-12	6.74752e-13	8.57775e-14	1.0515e-14	1.24452e-15	1.42389e-16	1.57655e-17	1.69102e-18	1.75885e-19	1.77559e-20	1.74128e-21	1.66019e-22	1.5401e-23	1.3911e-24	1.2243e-25	1.05056e-26	5
232		1.61162	6.65265	13.7308	18.8933	19.4976	16.0969	11.0745	6.53069	3.36978	1.54558	0.638005	0.239422	0.0823598	0.026152	0.00771097	0.00212202	0.000547473	0.000132937	3.04864e-05	6.62346e-06	1.36706e-06	2.6872e-07	5.04209e-08	9.04931e-09	1.55645e-09	2.56998e-10	4.08026e-11	6.23817e-12	9.19669e-13	1.30908e-13	1.80126e-14	2.39855e-15	3.09407e-16	3.87034e-17	4.69897e-18	5.54201e-19	6.35473e-20	7.0897e-21	7.70153e-22	8.15164e-23	8.41235e-24	6
238		4.74439	14.4619	22.0414	22.3956	17.0666	10.4045	5.28585	2.30176	0.877032	0.297042	0.0905444	0.0250907	0.00637348	0.00149444	0.000325382	6.61222e-05	1.25971e-05	2.25874e-06	3.82507e-07	6.13663e-08	9.35285e-09	1.35759e-09	1.88101e-10	2.49292e-11	3.16622e-12	3.86051e-13	4.52602e-14	5.10972e-15	5.56267e-16	5.84695e-17	5.94091e-18	5.84165e-19	5.56455e-20	5.13997e-21	4.60814e-22	4.01331e-23	3.39816e-24	2.79954e-25	2.24568e-26	1.7552e-27	1.33756e-28	5
237		0.903522	4.25254	10.0076	15.7006	18.4742	17.3902	13.6416	9.17224	5.39629	2.82203	1.32822	0.568314	0.222903	0.0807018	0.0271309	0.00851301	0.00250422	0.000693319	0.000181289	4.49083e-05	1.05683e-05	2.36862e-06	5.06738e-07	1.03697e-07	2.03359e-08	3.82854e-09	6.93057e-10	1.20813e-10	2.0308e-11	3.29593e-12	5.1709e-13	7.8508e-14	1.15471e-14	1.64691e-15	2.27982e-16	3.06578e-17	4.00819e-18	5.09867e-19	6.31513e-20	7.62127e-21	8.96762e-22	6
239		1.85147	7.38588	14.7318	19.5893	19.5364	15.5869	10.3632	5.9058	2.94492	1.30531	0.520714	0.188839	0.0627761	0.0192635	0.00548899	0.00145977	0.000363957	8.54054e-05	1.89277e-05	3.974e-06	7.92652e-07	1.50573e-07	2.7303e-08	4.7355e-09	7.87117e-10	1.25598e-10	1.92706e-11	2.84719e-12	4.05641e-13	5.57993e-14	7.41979e-15	9.54805e-16	1.19028e-16	1.43886e-17	1.68821e-18	1.92416e-19	2.13218e-20	2.29883e-21	2.41328e-22	2.46847e-23	2.46179e-24	5
243		0.221318	1.35299	4.13563	8.42749	12.88	15.7479	16.0453	14.0129	10.7082	7.27362	4.4466	2.47123	1.25895	0.592029	0.258519	0.105361	0.0402565	0.0144765	0.00491665	0.00158195	0.000483549	0.000140766	3.91159e-05	1.03969e-05	2.64831e-06	6.47599e-07	1.52268e-07	3.44765e-08	7.52737e-09	1.5868e-09	3.23354e-10	6.37667e-11	1.21821e-11	2.25676e-12	4.05773e-13	7.0875e-14	1.20356e-14	1.98858e-15	3.19917e-16	5.01476e-17	7.66421e-18	8
239		0.262094	1.55795	4.63039	9.17468	13.6341	16.2088	16.0581	13.6362	10.132	6.6919	3.97781	2.14955	1.06478	0.486869	0.206718	0.0819186	0.0304339	0.0106415	0.0035142	0.00109943	0.000326763	9.24929e-05	2.49908e-05	6.45874e-06	1.59967e-06	3.80353e-07	8.69578e-08	1.91443e-08	4.06421e-09	8.33055e-10	1.65062e-10	3.16505e-11	5.8793e-12	1.05903e-12	1.8515e-13	3.14449e-14	5.19209e-15	8.34133e-16	1.30481e-16	1.98874e-17	2.95537e-18	7

## Sheet: 0.89 mL.min
0.89 mL/min
	/collision	0	1	2	3	4	5	6	7	8	9	10	11	12	13	14	15	16	17	18	19	20	21	22	23	24	25	26	27	28	29	30	31	32	33	34	35	36	37	38	39	40	j
mass/
9		0.813112	3.91274	9.41416	15.1005	18.1661	17.4833	14.0218	9.63907	5.79797	3.10002	1.49175	0.652579	0.261687	0.0968657	0.0332945	0.010681	0.00321235	0.000909295	0.000243088	6.15659e-05	1.48129e-05	3.39432e-06	7.42438e-07	1.55333e-07	3.11446e-08	5.99478e-09	1.10951e-09	1.97742e-10	3.39837e-11	5.63902e-12	9.04509e-13	1.40405e-13	2.11136e-14	3.07879e-15	4.35744e-16	5.99093e-17	8.00797e-18	1.04148e-18	1.31886e-19	1.62729e-20	1.95765e-21	6
11		2.21371	8.43535	16.0715	20.4134	19.4463	14.82	9.41195	5.12346	2.44037	1.03322	0.39371	0.136385	0.0433078	0.0126942	0.00345508	0.000877705	0.000209031	4.68536e-05	9.91865e-06	1.98921e-06	3.78994e-07	6.87694e-08	1.19112e-08	1.97337e-09	3.13313e-10	4.77552e-11	6.99889e-12	9.8775e-13	1.34422e-13	1.76626e-14	2.24344e-15	2.75762e-16	3.28373e-17	3.79171e-18	4.2495e-19	4.62649e-20	4.89701e-21	5.04325e-22	5.05719e-23	4.94113e-24	4.70704e-25	5
23		0.0168736	0.146584	0.636699	1.8437	4.00415	6.95695	10.0727	12.5005	13.5742	13.1024	11.3823	8.98911	6.5075	4.3486	2.69836	1.56274	0.84849	0.433587	0.209258	0.095677	0.0415582	0.0171916	0.00678847	0.00256403	0.00092809	0.000322499	0.000107754	3.46696e-05	1.07565e-05	3.22219e-06	9.33057e-07	2.61472e-07	7.09829e-08	1.86861e-08	4.7744e-09	1.18503e-09	2.8596e-10	6.71402e-11	1.53489e-11	3.41894e-12	7.42524e-13	10
24		0.181285	1.14443	3.6123	7.60131	11.9965	15.1464	15.9362	14.3718	11.3409	7.95483	5.02177	2.88197	1.51612	0.736235	0.331982	0.139717	0.0551258	0.0204706	0.00717934	0.00238538	0.000752927	0.000226339	6.49475e-05	1.78263e-05	4.68894e-06	1.18402e-06	2.87483e-07	6.72163e-08	1.51545e-08	3.29891e-09	6.94184e-10	1.41364e-10	2.78878e-11	5.3349e-12	9.90542e-13	1.78661e-13	3.13295e-14	5.34537e-15	8.88015e-16	1.43741e-16	2.26854e-17	8
27		0.628367	3.1857	8.07542	13.6469	17.2968	17.5383	14.8193	10.733	6.80174	3.8315	1.94249	0.895277	0.37824	0.147508	0.0534168	0.0180542	0.00572069	0.00170604	0.000480517	0.000128217	3.25017e-05	7.84654e-06	1.8082e-06	3.98575e-07	8.41956e-08	1.70742e-08	3.32934e-09	6.25151e-10	1.13192e-10	1.97884e-11	3.34411e-12	5.46902e-13	8.66463e-14	1.33115e-14	1.9849e-15	2.87516e-16	4.04902e-17	5.54804e-18	7.40196e-19	9.62217e-20	1.21956e-20	7
39		0.00063399	0.007588	0.045409	0.181162	0.542065	1.29756	2.58833	4.42555	6.62098	8.80491	10.5383	11.4663	11.4363	10.529	9.0013	7.18223	5.3726	3.78251	2.51509	1.58433	0.948112	0.540363	0.293973	0.152977	0.0762885	0.0365228	0.0168126	0.00745276	0.00318569	0.00131477	0.000524536	0.000202516	7.57449e-05	2.74717e-05	9.67055e-06	3.30695e-06	1.09944e-06	3.55643e-07	1.12015e-07	3.43761e-08	1.02859e-08	13
40		0.0134153	0.119618	0.533287	1.58502	3.53323	6.30083	9.36359	11.9273	13.2937	13.1704	11.7435	9.51918	7.07317	4.8514	3.08983	1.83671	1.02357	0.536862	0.265942	0.124804	0.055641	0.023625	0.00957513	0.00371204	0.00137911	0.000491874	0.000168685	5.57068e-05	1.77397e-05	5.45437e-06	1.62114e-06	4.66287e-07	1.29927e-07	3.5106e-08	9.20659e-09	2.34545e-09	5.80925e-10	1.39996e-10	3.28494e-11	7.51032e-12	1.67415e-12	10
51		0.0481525	0.367815	1.40479	3.57685	6.83049	10.435	13.2847	14.4966	13.8416	11.7478	8.9736	6.23139	3.96657	2.33068	1.27164	0.647568	0.309155	0.138912	0.0589491	0.0236993	0.00905141	0.00329236	0.00114313	0.000379647	0.000120831	3.69191e-05	1.08465e-05	3.06857e-06	8.37122e-07	2.20497e-07	5.61425e-08	1.38338e-08	3.30219e-09	7.64363e-10	1.71724e-10	3.74779e-11	7.95213e-12	1.6417e-12	3.30005e-13	6.46349e-14	1.23429e-14	9
52		0.0627476	0.462688	1.70589	4.19296	7.72952	11.3992	14.0092	14.7573	13.6022	11.1445	8.21771	5.50871	3.38501	1.92003	1.01128	0.497133	0.22911	0.0993773	0.0407105	0.0157995	0.00582514	0.0020454	0.000685563	0.000219792	6.75292e-05	1.99179e-05	5.64887e-06	1.54273e-06	4.06278e-07	1.03304e-07	2.53914e-08	6.03973e-09	1.39174e-09	3.10983e-10	6.7445e-11	1.42093e-11	2.91047e-12	5.80033e-13	1.12554e-13	2.12808e-14	3.92301e-15	9
55		0.0813856	0.578955	2.05926	4.88301	8.68411	12.3553	14.6487	14.8867	13.2375	10.4631	7.44315	4.8135	2.85349	1.56146	0.793414	0.376276	0.167295	0.0700054	0.0276666	0.0103586	0.0036844	0.00124809	0.000403571	0.000124821	3.69977e-05	1.05277e-05	2.88042e-06	7.58909e-07	1.9281e-07	4.72964e-08	1.12151e-08	2.57359e-09	5.72119e-10	1.2333e-10	2.58041e-11	5.24466e-12	1.03636e-12	1.99254e-13	3.73011e-14	6.80383e-15	1.21002e-15	9
56		0.105068	0.720589	2.47102	5.649	9.68567	13.2855	15.186	14.8786	12.7553	9.71999	6.66628	4.15632	2.37544	1.2532	0.613916	0.280695	0.120319	0.0485402	0.0184947	0.00667591	0.00228928	0.000747647	0.000233073	6.94994e-05	1.98604e-05	5.44835e-06	1.43717e-06	3.65059e-07	8.94176e-08	2.11467e-08	4.83436e-09	1.06954e-09	2.29225e-10	4.76394e-11	9.60959e-12	1.88302e-12	3.58732e-13	6.64945e-14	1.20011e-14	2.11044e-15	3.61852e-16	8
59		0.128454	0.855165	2.84657	6.31687	10.5134	13.9983	15.5319	14.7716	12.2925	9.09284	6.05342	3.66362	2.0325	1.04085	0.494951	0.219671	0.0914016	0.0357937	0.0132384	0.00463857	0.00154403	0.000489483	0.000148121	4.28736e-05	1.18927e-05	3.16696e-06	8.10906e-07	1.99944e-07	4.75392e-08	1.09133e-08	2.42178e-09	5.20086e-10	1.082e-10	2.1828e-11	4.27403e-12	8.12963e-13	1.50338e-13	2.70502e-14	4.73901e-15	8.08955e-16	1.34638e-16	8
60		0.149058	0.970158	3.15718	6.84959	11.1453	14.508	15.7378	14.633	11.905	8.60943	5.60353	3.31555	1.7983	0.900336	0.418566	0.181618	0.0738799	0.0282855	0.0102277	0.00350358	0.00114017	0.000353375	0.000104544	2.95842e-05	8.02297e-06	2.08873e-06	5.22872e-07	1.26043e-07	2.92987e-08	6.57562e-09	1.4266e-09	2.99521e-10	6.09206e-11	1.20154e-11	2.30009e-12	4.27725e-13	7.73301e-14	1.3603e-14	2.3299e-15	3.8883e-16	6.32683e-17	8
64		0.181285	1.14443	3.6123	7.60131	11.9965	15.1464	15.9362	14.3718	11.3409	7.95483	5.02177	2.88197	1.51612	0.736235	0.331982	0.139717	0.0551258	0.0204706	0.00717934	0.00238538	0.000752927	0.000226339	6.49475e-05	1.78263e-05	4.68894e-06	1.18402e-06	2.87483e-07	6.72163e-08	1.51545e-08	3.29891e-09	6.94184e-10	1.41364e-10	2.78878e-11	5.3349e-12	9.90542e-13	1.78661e-13	3.13295e-14	5.34537e-15	8.88015e-16	1.43741e-16	2.26854e-17	8
66		0.209539	1.29244	3.9859	8.19503	12.6368	15.5887	16.0253	14.1206	10.887	7.46123	4.6021	2.58053	1.32639	0.629324	0.277263	0.114011	0.0439512	0.0159466	0.00546437	0.00177391	0.000547075	0.000160684	4.50501e-05	1.20813e-05	3.1049e-06	7.66042e-07	1.81729e-07	4.15151e-08	9.1452e-09	1.94509e-09	3.99912e-10	7.95698e-11	1.53371e-11	2.86665e-12	5.20045e-13	9.16471e-14	1.57022e-14	2.61761e-15	4.2488e-16	6.71966e-17	1.03617e-17	8
70		0.278537	1.63874	4.82065	9.4539	13.9052	16.3619	16.0439	13.4846	9.91686	6.48274	3.81404	2.03995	1.00015	0.452634	0.190215	0.0746072	0.0274339	0.00949434	0.00310326	0.00096093	0.000282675	7.91946e-05	2.11787e-05	5.41749e-06	1.32805e-06	3.12536e-07	7.07217e-08	1.54105e-08	3.23805e-09	6.5692e-10	1.2883e-10	2.44502e-11	4.4953e-12	8.01441e-13	1.38682e-13	2.33119e-14	3.80979e-15	6.05796e-16	9.37927e-17	1.41492e-17	2.08112e-18	7
75		0.746728	3.65689	8.95432	14.6171	17.8958	17.528	14.3064	10.0088	6.12692	3.33388	1.63267	0.72687	0.296637	0.111746	0.039089	0.0127618	0.0039061	0.00112524	0.000306141	7.89075e-05	1.93214e-05	4.50577e-06	1.00299e-06	2.13559e-07	4.3577e-08	8.53625e-09	1.60784e-09	2.91629e-10	5.10061e-11	8.61339e-12	1.40606e-12	2.22122e-13	3.39931e-14	5.04461e-15	7.26605e-16	1.01667e-16	1.38302e-17	1.83053e-18	2.35908e-19	2.96229e-20	3.62675e-21	6
78		1.1819	5.24532	11.6395	17.2189	19.1046	16.9574	12.543	7.95232	4.4116	2.17543	0.965467	0.389526	0.144061	0.0491809	0.0155905	0.00461276	0.00127948	0.000334023	8.23561e-05	1.92369e-05	4.26871e-06	9.0213e-07	1.81986e-07	3.51158e-08	6.49357e-09	1.15275e-09	1.96768e-10	3.23431e-11	5.12644e-12	7.84531e-13	1.1606e-13	1.66154e-14	2.30438e-15	3.09907e-16	4.04524e-17	5.12942e-18	6.32351e-19	7.58488e-20	8.85843e-21	1.00806e-21	1.11845e-22	6
85		0.000139188	0.00187693	0.0126551	0.056884	0.191768	0.517193	1.16238	2.23921	3.77443	5.6553	7.62609	9.34879	10.5056	10.8974	10.4964	9.43618	7.95285	6.30841	4.726	3.35418	2.26153	1.45221	0.890129	0.521881	0.293229	0.158166	0.0820324	0.0409702	0.0197313	0.00917497	0.0041241	0.00179397	0.00075598	0.000308918	0.000122521	4.7205e-05	1.7682e-05	6.44431e-06	2.28686e-06	7.90716e-07	2.66567e-07	15
88		0.00298985	0.0311473	0.162242	0.563396	1.46732	3.05723	5.30821	7.89991	10.2874	11.9079	12.4053	11.7486	10.1994	8.17343	6.08203	4.22405	2.75031	1.6854	0.975447	0.534838	0.278589	0.138203	0.0654434	0.0296422	0.0128668	0.0053617	0.00214833	0.000828914	0.000308407	0.000110789	3.84723e-05	1.29288e-05	4.20902e-06	1.32874e-06	4.07129e-07	1.21181e-07	3.50675e-08	9.8736e-09	2.70685e-09	7.23055e-10	1.88314e-10	12
95		0.0168736	0.146584	0.636699	1.8437	4.00415	6.95695	10.0727	12.5005	13.5742	13.1024	11.3823	8.98911	6.5075	4.3486	2.69836	1.56274	0.84849	0.433587	0.209258	0.095677	0.0415582	0.0171916	0.00678847	0.00256403	0.00092809	0.000322499	0.000107754	3.46696e-05	1.07565e-05	3.22219e-06	9.33057e-07	2.61472e-07	7.09829e-08	1.86861e-08	4.7744e-09	1.18503e-09	2.8596e-10	6.71402e-11	1.53489e-11	3.41894e-12	7.42524e-13	10
106		0.0535616	0.403431	1.51934	3.8146	7.18298	10.8206	13.5836	14.6161	13.7613	11.5168	8.67456	5.93978	3.72825	2.16012	1.16216	0.583565	0.274717	0.121717	0.0509325	0.020191	0.00760402	0.00272734	0.000933754	0.000305788	9.59677e-05	2.89135e-05	8.37612e-06	2.33666e-06	6.28569e-07	1.63256e-07	4.09888e-08	9.95907e-09	2.34415e-09	5.3504e-10	1.18529e-10	2.55077e-11	5.33684e-12	1.08642e-12	2.15343e-13	4.15893e-14	7.83136e-15	9
107		0.0661225	0.48411	1.77219	4.32497	7.91623	11.5916	14.1445	14.794	13.5391	11.0139	8.06375	5.3671	3.27456	1.84419	0.964434	0.470735	0.215403	0.0927679	0.0377329	0.0145399	0.00532264	0.00185568	0.000617554	0.000196581	5.99689e-05	1.75623e-05	4.94542e-06	1.34102e-06	3.50648e-07	8.85256e-08	2.16044e-08	5.10242e-09	1.1674e-09	2.59001e-10	5.57723e-11	1.16666e-11	2.37267e-12	4.69496e-13	9.04572e-14	1.69814e-14	3.1082e-15	9
114		0.110513	0.752347	2.56091	5.81139	9.89069	13.4668	15.2798	14.8603	12.6457	9.5655	6.512	4.03021	2.28641	1.19734	0.582231	0.264247	0.112434	0.0450251	0.017029	0.00610157	0.00207691	0.000673295	0.000208348	6.16692e-05	1.7493e-05	4.76354e-06	1.24728e-06	3.1449e-07	7.64636e-08	1.795e-08	4.07332e-09	8.94527e-10	1.90305e-10	3.92593e-11	7.86087e-12	1.52901e-12	2.89143e-13	5.32008e-14	9.53105e-15	1.66373e-15	2.83158e-16	8
115		0.00280877	0.0294364	0.15425	0.538854	1.41182	2.95923	5.16887	7.73867	10.1378	11.8051	12.372	11.7873	10.2945	8.29906	6.21254	4.34057	2.84312	1.75273	1.0205	0.562894	0.294961	0.147202	0.070123	0.0319522	0.0139527	0.00584908	0.00235767	0.00091514	0.00034253	0.000123785	4.3243e-05	1.46192e-05	4.78787e-06	1.52054e-06	4.68691e-07	1.40342e-07	4.08558e-08	1.15723e-08	3.19158e-09	8.57648e-10	2.24708e-10	12
133		1.20857e-05	0.000192509	0.00153321	0.00814064	0.0324174	0.103273	0.274167	0.623872	1.24218	2.19848	3.50188	5.07093	6.73109	8.24747	9.38366	9.9646	9.92017	9.295	8.22538	6.89575	5.492	4.16572	3.01611	2.08881	1.38633	0.883294	0.541142	0.319247	0.181613	0.0997537	0.0529647	0.0272147	0.0135467	0.00653881	0.00306337	0.00139415	0.00061686	0.000265561	0.000111317	4.54647e-05	1.81048e-05	17
137		0.00032184	0.00407019	0.0257371	0.108496	0.343026	0.867625	1.82876	3.30394	5.22296	7.33921	9.28162	10.671	11.246	10.9403	9.88274	8.33222	6.5859	4.89938	3.44226	2.29121	1.4488	0.872498	0.501553	0.27578	0.14532	0.0735125	0.0357571	0.0167484	0.00756468	0.00329888	0.00139066	0.000567327	0.000224212	8.59249e-05	3.19606e-05	1.15484e-05	4.05689e-06	1.38665e-06	4.61485e-07	1.49647e-07	4.73132e-08	14
139		0.0200014	0.170354	0.725465	2.05962	4.38552	7.4704	10.6044	12.9027	13.7367	12.9997	11.072	8.57288	6.08469	3.98647	2.42523	1.37707	0.73304	0.367258	0.173777	0.0778989	0.0331737	0.0134545	0.00520881	0.00192887	0.000684518	0.000233205	7.63937e-05	2.40983e-05	7.3303e-06	2.15286e-06	6.11207e-07	1.67927e-07	4.46954e-08	1.15356e-08	2.88972e-09	7.03202e-10	1.66368e-10	3.82968e-11	8.58364e-12	1.87456e-12	3.99147e-13	10
140		0.0267513	0.220065	0.905166	2.48207	5.10459	8.39842	11.5147	13.532	13.9149	12.7187	10.4628	7.82463	5.36401	3.39432	1.99449	1.09382	0.562386	0.27214	0.124373	0.0538493	0.0221491	0.00867649	0.00324435	0.0011604	0.000397743	0.000130879	4.14098e-05	1.26167e-05	3.70677e-06	1.05149e-06	2.8833e-07	7.65129e-08	1.96694e-08	4.90326e-09	1.18635e-09	2.78838e-10	6.3717e-11	1.41664e-11	3.06679e-12	6.46884e-13	1.33037e-13	10
141		0.0264562	0.217931	0.897598	2.46463	5.07557	8.36193	11.4801	13.5096	13.9105	12.7319	10.4878	7.85387	5.39131	3.4162	2.01005	1.10384	0.568302	0.275374	0.126021	0.0546362	0.0225031	0.00882704	0.0033051	0.00118372	0.000406283	0.000133869	4.2413e-05	1.29398e-05	3.80681e-06	1.08132e-06	2.96911e-07	7.88963e-08	2.03095e-08	5.06963e-09	1.22826e-09	2.89077e-10	6.61459e-11	1.47263e-11	3.19228e-12	6.74262e-13	1.38855e-13	10
146		0.0279626	0.228792	0.935994	2.55278	5.22176	8.54494	11.6525	13.6202	13.9302	12.6642	10.3619	7.70743	5.25522	3.30758	1.93306	1.05442	0.53921	0.25952	0.117967	0.0508008	0.0207827	0.00809741	0.00301152	0.00107132	0.000365234	0.000119535	3.76169e-05	1.13994e-05	3.33109e-06	9.39833e-07	2.56326e-07	6.76539e-08	1.72984e-08	4.28898e-09	1.03214e-09	2.41286e-10	5.48393e-11	1.2127e-11	2.61115e-12	5.47809e-13	1.12055e-13	10
147		0.0295493	0.240143	0.975805	2.64341	5.37067	8.72934	11.8237	13.7271	13.9448	12.5919	10.2333	7.56041	5.1202	3.20086	1.85807	1.00669	0.511325	0.244439	0.110362	0.0472053	0.0191816	0.00742314	0.00274213	0.00096891	0.000328092	0.000106654	3.33371e-05	1.00343e-05	2.91241e-06	8.16164e-07	2.21095e-07	5.79617e-08	1.47202e-08	3.62513e-09	8.66497e-10	2.01197e-10	4.54196e-11	9.97618e-12	2.13355e-12	4.44593e-13	9.03286e-14	10
153		0.0295493	0.240143	0.975805	2.64341	5.37067	8.72934	11.8237	13.7271	13.9448	12.5919	10.2333	7.56041	5.1202	3.20086	1.85807	1.00669	0.511325	0.244439	0.110362	0.0472053	0.0191816	0.00742314	0.00274213	0.00096891	0.000328092	0.000106654	3.33371e-05	1.00343e-05	2.91241e-06	8.16164e-07	2.21095e-07	5.79617e-08	1.47202e-08	3.62513e-09	8.66497e-10	2.01197e-10	4.54196e-11	9.97618e-12	2.13355e-12	4.44593e-13	9.03286e-14	10
157		0.0295493	0.240143	0.975805	2.64341	5.37067	8.72934	11.8237	13.7271	13.9448	12.5919	10.2333	7.56041	5.1202	3.20086	1.85807	1.00669	0.511325	0.244439	0.110362	0.0472053	0.0191816	0.00742314	0.00274213	0.00096891	0.000328092	0.000106654	3.33371e-05	1.00343e-05	2.91241e-06	8.16164e-07	2.21095e-07	5.79617e-08	1.47202e-08	3.62513e-09	8.66497e-10	2.01197e-10	4.54196e-11	9.97618e-12	2.13355e-12	4.44593e-13	9.03286e-14	10
163		0.0329793	0.264397	1.05984	2.83226	5.67659	9.1019	12.1617	13.9287	13.9584	12.4339	9.96831	7.26513	4.85374	2.99328	1.71409	0.916129	0.45904	0.216479	0.096418	0.0406835	0.0163081	0.00622584	0.00226877	0.000790817	0.000264167	8.47137e-05	2.61213e-05	7.75613e-06	2.22076e-06	6.13928e-07	1.64063e-07	4.2429e-08	1.06299e-08	2.58242e-09	6.08924e-10	1.39479e-10	3.10614e-11	6.73029e-12	1.41992e-12	2.91887e-13	5.85017e-14	10
165		0.03678	0.290855	1.15004	3.03149	5.99323	9.47886	12.4931	14.1136	13.9512	12.2584	9.69392	6.96902	4.59257	2.79368	1.57803	0.831932	0.411181	0.191271	0.0840314	0.0349746	0.0138289	0.00520755	0.00187187	0.000643596	0.000212064	6.70799e-05	2.04025e-05	5.97565e-06	1.68769e-06	4.60213e-07	1.21312e-07	3.09461e-08	7.64753e-09	1.83262e-09	4.26244e-10	9.63065e-11	2.11552e-11	4.52149e-12	9.40942e-13	1.90793e-13	3.77197e-14	9
166		0.03678	0.290855	1.15004	3.03149	5.99323	9.47886	12.4931	14.1136	13.9512	12.2584	9.69392	6.96902	4.59257	2.79368	1.57803	0.831932	0.411181	0.191271	0.0840314	0.0349746	0.0138289	0.00520755	0.00187187	0.000643596	0.000212064	6.70799e-05	2.04025e-05	5.97565e-06	1.68769e-06	4.60213e-07	1.21312e-07	3.09461e-08	7.64753e-09	1.83262e-09	4.26244e-10	9.63065e-11	2.11552e-11	4.52149e-12	9.40942e-13	1.90793e-13	3.77197e-14	9
169		0.03678	0.290855	1.15004	3.03149	5.99323	9.47886	12.4931	14.1136	13.9512	12.2584	9.69392	6.96902	4.59257	2.79368	1.57803	0.831932	0.411181	0.191271	0.0840314	0.0349746	0.0138289	0.00520755	0.00187187	0.000643596	0.000212064	6.70799e-05	2.04025e-05	5.97565e-06	1.68769e-06	4.60213e-07	1.21312e-07	3.09461e-08	7.64753e-09	1.83262e-09	4.26244e-10	9.63065e-11	2.11552e-11	4.52149e-12	9.40942e-13	1.90793e-13	3.77197e-14	9
172		0.03678	0.290855	1.15004	3.03149	5.99323	9.47886	12.4931	14.1136	13.9512	12.2584	9.69392	6.96902	4.59257	2.79368	1.57803	0.831932	0.411181	0.191271	0.0840314	0.0349746	0.0138289	0.00520755	0.00187187	0.000643596	0.000212064	6.70799e-05	2.04025e-05	5.97565e-06	1.68769e-06	4.60213e-07	1.21312e-07	3.09461e-08	7.64753e-09	1.83262e-09	4.26244e-10	9.63065e-11	2.11552e-11	4.52149e-12	9.40942e-13	1.90793e-13	3.77197e-14	9
175		0.0409881	0.319693	1.24674	3.24139	6.32042	9.8594	12.8166	14.2807	13.9231	12.0661	9.41114	6.67305	4.33728	2.60225	1.44976	0.75384	0.36748	0.168601	0.0730571	0.0299905	0.0116957	0.00434394	0.00154005	0.000522255	0.000169725	5.29518e-05	1.58848e-05	4.58874e-06	1.27823e-06	3.43785e-07	8.93799e-08	2.24881e-08	5.48123e-09	1.2955e-09	2.9719e-10	6.62279e-11	1.43487e-11	3.02473e-12	6.20837e-13	1.24162e-13	2.42104e-14	9
182		0.0142109	0.125893	0.55764	1.64669	3.64698	6.46165	9.54054	12.0741	13.3704	13.1608	11.6591	9.38971	6.93189	4.72377	2.9891	1.76535	0.977441	0.509357	0.250686	0.116885	0.0517735	0.0218408	0.00879481	0.0033875	0.0012504	0.000443087	0.000150972	4.95351e-05	1.56724e-05	4.7876e-06	1.41376e-06	4.04013e-07	1.11847e-07	3.00257e-08	7.82338e-09	1.98019e-09	4.87287e-10	1.16671e-10	2.71995e-11	6.1784e-12	1.36835e-12	10
193		0.0295493	0.240143	0.975805	2.64341	5.37067	8.72934	11.8237	13.7271	13.9448	12.5919	10.2333	7.56041	5.1202	3.20086	1.85807	1.00669	0.511325	0.244439	0.110362	0.0472053	0.0191816	0.00742314	0.00274213	0.00096891	0.000328092	0.000106654	3.33371e-05	1.00343e-05	2.91241e-06	8.16164e-07	2.21095e-07	5.79617e-08	1.47202e-08	3.62513e-09	8.66497e-10	2.01197e-10	4.54196e-11	9.97618e-12	2.13355e-12	4.44593e-13	9.03286e-14	10
195		0.0348311	0.27734	1.10415	2.93056	5.83358	9.28988	12.3283	14.0233	13.9574	12.3483	9.83223	7.11712	4.72245	2.89247	1.64508	0.873251	0.434574	0.203545	0.0900393	0.0377332	0.0150224	0.00569591	0.00206151	0.000713678	0.000236775	7.5412e-05	2.30947e-05	6.81072e-06	1.93678e-06	5.31773e-07	1.4114e-07	3.62521e-08	9.02044e-09	2.1765e-09	5.09712e-10	1.15958e-10	2.56474e-11	5.51933e-12	1.15651e-12	2.36117e-13	4.70016e-14	9
197		0.0409881	0.319693	1.24674	3.24139	6.32042	9.8594	12.8166	14.2807	13.9231	12.0661	9.41114	6.67305	4.33728	2.60225	1.44976	0.75384	0.36748	0.168601	0.0730571	0.0299905	0.0116957	0.00434394	0.00154005	0.000522255	0.000169725	5.29518e-05	1.58848e-05	4.58874e-06	1.27823e-06	3.43785e-07	8.93799e-08	2.24881e-08	5.48123e-09	1.2955e-09	2.9719e-10	6.62279e-11	1.43487e-11	3.02473e-12	6.20837e-13	1.24162e-13	2.42104e-14	9
205		0.105068	0.720589	2.47102	5.649	9.68567	13.2855	15.186	14.8786	12.7553	9.71999	6.66628	4.15632	2.37544	1.2532	0.613916	0.280695	0.120319	0.0485402	0.0184947	0.00667591	0.00228928	0.000747647	0.000233073	6.94994e-05	1.98604e-05	5.44835e-06	1.43717e-06	3.65059e-07	8.94176e-08	2.11467e-08	4.83436e-09	1.06954e-09	2.29225e-10	4.76394e-11	9.60959e-12	1.88302e-12	3.58732e-13	6.64945e-14	1.20011e-14	2.11044e-15	3.61852e-16	8
208		0.116218	0.785335	2.65344	5.97683	10.0971	13.6461	15.3688	14.8363	12.532	9.40938	6.35835	3.90603	2.19957	1.14335	0.551866	0.248614	0.105	0.0417373	0.0156688	0.0055727	0.00188286	0.000605876	0.000186099	5.46764e-05	1.53947e-05	4.16118e-06	1.0815e-06	2.70674e-07	6.53239e-08	1.52215e-08	3.42862e-09	7.4738e-10	1.57825e-10	3.2318e-11	6.42317e-12	1.24012e-12	2.3278e-13	4.25136e-14	7.56011e-15	1.30993e-15	2.21295e-16	8
232		0.0295493	0.240143	0.975805	2.64341	5.37067	8.72934	11.8237	13.7271	13.9448	12.5919	10.2333	7.56041	5.1202	3.20086	1.85807	1.00669	0.511325	0.244439	0.110362	0.0472053	0.0191816	0.00742314	0.00274213	0.00096891	0.000328092	0.000106654	3.33371e-05	1.00343e-05	2.91241e-06	8.16164e-07	2.21095e-07	5.79617e-08	1.47202e-08	3.62513e-09	8.66497e-10	2.01197e-10	4.54196e-11	9.97618e-12	2.13355e-12	4.44593e-13	9.03286e-14	10
238		0.247589	1.48582	4.45831	8.91835	13.3801	16.0592	16.0623	13.7704	10.3298	6.88783	4.1335	2.25507	1.12775	0.520601	0.223158	0.0892803	0.0334866	0.0118211	0.00394112	0.0012448	0.000373513	0.000106739	2.91161e-05	7.59698e-06	1.89961e-06	4.55994e-07	1.0525e-07	2.33933e-08	5.01383e-09	1.03754e-09	2.07549e-10	4.01785e-11	7.53491e-12	1.37025e-12	2.41855e-13	4.14689e-14	6.91281e-15	1.12121e-15	1.77068e-16	2.72464e-17	4.08775e-18	8
237		0.00945702	0.0876304	0.405999	1.25402	2.90498	5.38362	8.31425	11.0059	12.7478	13.1248	12.1617	10.2447	7.91078	5.63866	3.73206	2.30546	1.33517	0.727761	0.374642	0.18271	0.0846512	0.037352	0.0157323	0.00633817	0.0024471	0.000907011	0.000323251	0.000110937	3.67128e-05	1.17306e-05	3.62326e-06	1.08302e-06	3.13608e-07	8.8059e-08	2.39991e-08	6.35371e-09	1.6354e-09	4.09566e-10	9.98711e-11	2.37288e-11	5.49687e-12	11
239		0.0388307	0.304965	1.19756	3.13509	6.15552	9.66873	12.6559	14.1994	13.9398	12.1643	9.55351	6.82096	4.46415	2.69694	1.51293	0.79214	0.388827	0.179632	0.0783764	0.0323972	0.0127219	0.00475782	0.00169848	0.000579972	0.000189789	5.96219e-05	1.80098e-05	5.23865e-06	1.46939e-06	3.97936e-07	1.04176e-07	2.63925e-08	6.47747e-09	1.54158e-09	3.56092e-10	7.99042e-11	1.74318e-11	3.70012e-12	7.64728e-13	1.53999e-13	3.02366e-14	9
243		0.000592929	0.00713626	0.0429446	0.172288	0.518398	1.24785	2.5031	4.30376	6.47479	8.65867	10.4212	11.4024	11.4362	10.5878	9.10219	7.30336	5.49377	3.88946	2.60067	1.6474	0.991373	0.56818	0.310836	0.162656	0.0815695	0.0392695	0.0181782	0.00810316	0.00348309	0.00144555	0.000579938	0.000225158	8.46848e-05	3.08858e-05	1.09332e-05	3.75966e-06	1.25694e-06	4.08865e-07	1.29498e-07	3.99639e-08	1.20247e-08	14
239		0.000827157	0.00967996	0.0566407	0.22095	0.646426	1.51298	2.951	4.93351	7.21692	9.38415	10.982	11.6835	11.394	10.257	8.57388	6.68916	4.89257	3.36802	2.18971	1.34871	0.789177	0.439786	0.23394	0.119031	0.0580411	0.0271695	0.0122291	0.00530048	0.00221535	0.000893986	0.000348734	0.000131649	4.81454e-05	1.70736e-05	5.87669e-06	1.96494e-06	6.38753e-07	2.02031e-07	6.22184e-08	1.86698e-08	5.46218e-09	13

## Sheet: 1.49 mL.min
1.49 mL/min
	/collision	0	1	2	3	4	5	6	7	8	9	10	11	12	13	14	15	16	17	18	19	20	21	22	23	24	25	26	27	28	29	30	31	32	33	34	35	36	37	38	39	40	j
mass/
9		0.030461	0.246627	0.998405	2.69452	5.45403	8.83169	11.9176	13.7844	13.9506	12.5501	10.1611	7.47904	5.04616	3.14278	1.81753	0.981039	0.496435	0.236434	0.106349	0.0453185	0.018346	0.00707324	0.00260311	0.000916347	0.000309133	0.000100115	3.11762e-05	9.34881e-06	2.7033e-06	7.54731e-07	2.03689e-07	5.31988e-08	1.34601e-08	3.3024e-09	7.86406e-10	1.81918e-10	4.09137e-11	8.95288e-12	1.90755e-12	3.96011e-13	8.01573e-14	10
11		0.164286	1.05329	3.37649	7.21592	11.5659	14.8305	15.8472	14.5144	11.6321	8.28633	5.31263	3.09645	1.65436	0.815893	0.373639	0.159701	0.0639934	0.0241342	0.00859623	0.00290069	0.000929863	0.000283888	8.27315e-05	2.30616e-05	6.16064e-06	1.57991e-06	3.89589e-07	9.25104e-08	2.11826e-08	4.68305e-09	1.00082e-09	2.06985e-10	4.14703e-11	8.05694e-12	1.51928e-12	2.78303e-13	4.95635e-14	8.5883e-15	1.44901e-15	2.38206e-16	3.81804e-17	8
23		4.48875e-05	0.000656099	0.00479494	0.0233618	0.085367	0.249554	0.607935	1.26941	2.3193	3.76668	5.50557	7.31567	8.9108	10.0188	10.46	10.1926	9.3113	8.00581	6.50095	5.00112	3.65495	2.54394	1.69016	1.0741	0.654149	0.382455	0.215006	0.116394	0.06076	0.0306241	0.0149206	0.00703508	0.00321339	0.00142329	0.000611868	0.000255525	0.000103747	4.09843e-05	1.57644e-05	5.90824e-06	2.15895e-06	16
24		0.00243829	0.0258986	0.137543	0.486976	1.29312	2.74701	4.86295	7.37892	9.79702	11.5623	12.281	11.8586	10.4964	8.57609	6.50657	4.60736	3.0586	1.91102	1.12767	0.630408	0.334798	0.169338	0.0817566	0.037756	0.0167096	0.00709932	0.00290024	0.00114094	0.000432807	0.000158521	5.61252e-05	1.92303e-05	6.38305e-06	2.0545e-06	6.41826e-07	1.94778e-07	5.74684e-08	1.64975e-08	4.61132e-09	1.25589e-09	3.3349e-10	12
27		0.0197427	0.168408	0.718273	2.04232	4.35532	7.43031	10.5636	12.8727	13.7257	13.0092	11.097	8.60537	6.11708	4.01381	2.4456	1.39075	0.741458	0.372044	0.17631	0.0791553	0.0337603	0.0137133	0.00531712	0.00197199	0.00070089	0.000239148	7.84602e-05	2.4788e-05	7.55161e-06	2.22125e-06	6.31587e-07	1.73791e-07	4.6327e-08	1.1975e-08	3.00437e-09	7.3222e-10	1.73498e-10	3.9999e-11	8.97888e-12	1.96387e-12	4.18803e-13	10
39		1.79596e-07	3.61666e-06	3.64156e-05	0.000244443	0.00123063	0.00495642	0.0166352	0.0478563	0.120465	0.269543	0.542798	0.993701	1.66757	2.58316	3.71565	4.98831	6.27833	7.43713	8.32038	8.81861	8.87934	8.51475	7.79398	6.82405	5.72587	4.61224	3.57231	2.66438	1.91623	1.33064	0.893201	0.580227	0.365139	0.22282	0.131973	0.0759327	0.0424753	0.0231177	0.012251	0.00632584	0.0031847	22
40		3.05163e-05	0.000457818	0.00343419	0.0171737	0.0644119	0.193267	0.483245	1.03569	1.94224	3.23758	4.85715	6.62446	8.28191	9.55759	10.2419	10.2436	9.60491	8.47629	7.06471	5.5783	4.1844	2.98934	2.03852	1.32968	0.831185	0.498792	0.287811	0.159921	0.0856856	0.0443273	0.0221672	0.0107278	0.00502947	0.00228649	0.00100891	0.000432459	0.000180221	7.30742e-05	2.88497e-05	1.10978e-05	4.16236e-06	17
51		0.000262044	0.00336783	0.021642	0.0927154	0.297899	0.765728	1.64021	3.01147	4.83799	6.90874	8.87923	10.3743	11.111	10.9847	10.0841	8.64014	6.94028	5.24692	3.74635	2.53414	1.62846	0.996632	0.582222	0.32534	0.174222	0.0895651	0.0442733	0.0210744	0.00967327	0.00428698	0.00183657	0.000761415	0.000305807	0.0001191	4.50203e-05	1.65317e-05	5.90188e-06	2.05005e-06	6.93358e-07	2.28491e-07	7.34152e-08	14
52		0.0004091	0.00507559	0.0314857	0.130212	0.403875	1.00215	2.07224	3.67281	5.69594	7.85199	9.74174	10.9876	11.36	10.8415	9.6077	7.94667	6.16201	4.49708	3.09966	2.02404	1.25558	0.741793	0.418328	0.225656	0.116652	0.0578907	0.0276244	0.0126936	0.00562451	0.00240627	0.00099513	0.000398268	0.000154412	5.80531e-05	2.11838e-05	7.50917e-06	2.5879e-06	8.67765e-07	2.83319e-07	9.01297e-08	2.79553e-08	14
55		0.000633685	0.00758466	0.0453909	0.181096	0.541892	1.29719	2.58771	4.42467	6.61993	8.80386	10.5375	11.4658	11.4363	10.5295	9.00203	7.1831	5.37346	3.78328	2.5157	1.58477	0.948417	0.540559	0.294092	0.153044	0.0763253	0.0365419	0.0168221	0.00745726	0.00318774	0.00131567	0.000524915	0.00020267	7.58058e-05	2.74948e-05	9.6791e-06	3.31001e-06	1.1005e-06	3.56e-07	1.12132e-07	3.44134e-08	1.02974e-08	13
56		0.00097388	0.011238	0.0648398	0.249404	0.719492	1.6605	3.19353	5.26448	7.59361	9.73619	11.235	11.7859	11.3335	10.0601	8.29198	6.37896	4.60058	3.12282	2.00197	1.21587	0.70152	0.385481	0.202192	0.101442	0.0487742	0.022513	0.00999178	0.00427034	0.0017599	0.000700281	0.00026936	0.000100266	3.61566e-05	1.26432e-05	4.29103e-06	1.41474e-06	4.53478e-07	1.41429e-07	4.29474e-08	1.27074e-08	3.66588e-09	13
59		0.0013657	0.0152975	0.0856758	0.319892	0.895799	2.00682	3.74648	5.99504	8.394	10.447	11.702	11.9161	11.123	9.58393	7.66801	5.72609	4.00871	2.64133	1.64368	0.969015	0.54271	0.289478	0.147387	0.0717792	0.0335007	0.01501	0.00646658	0.00268273	0.00107321	0.000414529	0.000154775	5.5925e-05	1.9576e-05	6.64471e-06	2.18909e-06	7.00588e-07	2.17985e-07	6.59922e-08	1.94525e-08	5.58699e-09	1.56453e-09	13
60		0.00175412	0.0192093	0.10518	0.38394	1.05113	2.30217	4.20184	6.57345	8.9982	10.9488	11.9899	11.9365	10.893	9.17607	7.17763	5.24013	3.58653	2.31035	1.40559	0.810132	0.443586	0.231319	0.115144	0.0548233	0.0250153	0.0109577	0.00461527	0.00187191	0.000732115	0.000276461	0.000100917	3.56496e-05	1.21999e-05	4.04851e-06	1.30397e-06	4.07993e-07	1.24109e-07	3.67327e-08	1.05858e-08	2.97242e-09	8.1377e-10	12
64		0.00243829	0.0258986	0.137543	0.486976	1.29312	2.74701	4.86295	7.37892	9.79702	11.5623	12.281	11.8586	10.4964	8.57609	6.50657	4.60736	3.0586	1.91102	1.12767	0.630408	0.334798	0.169338	0.0817566	0.037756	0.0167096	0.00709932	0.00290024	0.00114094	0.000432807	0.000158521	5.61252e-05	1.92303e-05	6.38305e-06	2.0545e-06	6.41826e-07	1.94778e-07	5.74684e-08	1.64975e-08	4.61132e-09	1.25589e-09	3.3349e-10	12
66		0.00311117	0.0322875	0.167539	0.579568	1.50368	3.12101	5.39827	8.00327	10.3822	11.9717	12.4241	11.7215	10.1371	8.09247	5.99879	4.15033	2.69199	1.64337	0.947488	0.517524	0.268541	0.13271	0.0626023	0.0282471	0.0122144	0.00507041	0.00202386	0.000777906	0.000288323	0.000103179	3.56929e-05	1.1949e-05	3.87518e-06	1.21868e-06	3.7198e-07	1.10297e-07	3.17958e-08	8.91824e-09	2.4356e-09	6.48115e-10	1.68152e-10	12
70		0.00502243	0.0497171	0.246075	0.811967	2.00942	3.97825	6.56345	9.28167	11.4849	12.6322	12.5046	11.253	9.2828	7.0685	4.99794	3.29831	2.04063	1.18825	0.65347	0.340458	0.16851	0.0794325	0.0357411	0.0153827	0.00634471	0.00251225	0.000956494	0.000350679	0.000123978	4.23192e-05	1.39639e-05	4.45901e-06	1.37937e-06	4.13769e-07	1.20468e-07	3.40718e-08	9.3688e-09	2.50654e-09	6.52954e-10	1.65733e-10	4.10149e-11	11
75		0.0263944	0.217484	0.896008	2.46097	5.06946	8.35424	11.4728	13.5048	13.9096	12.7346	10.493	7.86003	5.39707	3.42082	2.01334	1.10597	0.569557	0.27606	0.126371	0.0548035	0.0225784	0.0088591	0.00331804	0.00118869	0.000408107	0.000134508	4.26276e-05	1.3009e-05	3.82825e-06	1.08772e-06	2.98752e-07	7.94081e-08	2.0447e-08	5.10542e-09	1.23728e-09	2.91283e-10	6.66696e-11	1.48471e-11	3.21939e-12	6.8018e-13	1.40113e-13	10
78		0.0571531	0.426773	1.5934	3.96607	7.40385	11.0572	13.761	14.6795	13.7018	11.3682	8.48887	5.76255	3.58584	2.0597	1.09859	0.54689	0.255233	0.11211	0.0465083	0.0182782	0.00682436	0.00242661	0.000823635	0.000267402	8.31975e-05	2.48501e-05	7.13693e-06	1.97381e-06	5.26386e-07	1.35539e-07	3.37365e-08	8.12635e-09	1.89628e-09	4.29088e-10	9.42377e-11	2.01055e-11	4.17032e-12	8.41637e-13	1.65386e-13	3.16658e-14	5.91137e-15	9
85		1.40081e-08	3.17827e-07	3.60555e-06	2.72686e-05	0.000154673	0.000701868	0.00265409	0.00860259	0.0243978	0.0615063	0.13955	0.287839	0.544227	0.949836	1.53933	2.32837	3.30175	4.40663	5.55451	6.6329	7.52463	8.12976	8.38429	8.27085	7.81898	7.09614	6.19242	5.20365	4.21659	3.29894	2.49497	1.82606	1.29472	0.890173	0.594028	0.38508	0.242694	0.148823	0.0888582	0.0516945	0.0293222	24
88		2.44118e-06	4.27895e-05	0.000375011	0.00219109	0.00960147	0.0336593	0.0983312	0.246224	0.539483	1.05068	1.84166	2.93464	4.28658	5.77969	7.23625	8.4559	9.26354	9.55136	9.30101	8.58053	7.52006	6.27681	5.00096	3.81121	2.78349	1.95158	1.31568	0.85413	0.534692	0.323179	0.188825	0.106766	0.0584819	0.0310631	0.0160141	0.00801997	0.00390488	0.00184988	0.00085329	0.000383504	0.000168053	19
95		4.48875e-05	0.000656099	0.00479494	0.0233618	0.085367	0.249554	0.607935	1.26941	2.3193	3.76668	5.50557	7.31567	8.9108	10.0188	10.46	10.1926	9.3113	8.00581	6.50095	5.00112	3.65495	2.54394	1.69016	1.0741	0.654149	0.382455	0.215006	0.116394	0.06076	0.0306241	0.0149206	0.00703508	0.00321339	0.00142329	0.000611868	0.000255525	0.000103747	4.09843e-05	1.57644e-05	5.90824e-06	2.15895e-06	16
106		0.000313448	0.00397234	0.0251708	0.10633	0.336883	0.853866	1.80351	3.26514	5.17242	7.28336	9.23024	10.6341	11.2306	10.9481	9.91042	8.37301	6.63197	4.94396	3.48083	2.32173	1.47117	0.887817	0.511425	0.281796	0.148801	0.0754303	0.0367666	0.0172572	0.00781077	0.00341332	0.00144191	0.000589463	0.000233446	8.96508e-05	3.34162e-05	1.20996e-05	4.2594e-06	1.45891e-06	4.86547e-07	1.58103e-07	5.00913e-08	14
107		0.000446798	0.00550392	0.0339002	0.139201	0.428689	1.05617	2.16841	3.81596	5.8759	8.04252	9.90724	11.0948	11.3894	10.7924	9.49618	7.79863	6.00425	4.35081	2.97754	1.93048	1.18904	0.697488	0.390548	0.209174	0.107363	0.0529025	0.0250648	0.0114356	0.0050311	0.0021371	0.000877534	0.000348709	0.000134237	5.01095e-05	1.81552e-05	6.38989e-06	2.18651e-06	7.27965e-07	2.35987e-07	7.45389e-08	2.29553e-08	14
114		0.00106028	0.0121449	0.0695563	0.265575	0.760499	1.74221	3.32599	5.44246	7.7925	9.9176	11.36	11.8293	11.2914	9.94894	8.13993	6.21586	4.44993	2.99831	1.90799	1.15025	0.658773	0.359326	0.187084	0.0931712	0.0444674	0.0203739	0.00897579	0.00380786	0.00155774	0.000615274	0.00023492	8.68019e-05	3.10707e-05	1.07847e-05	3.63331e-06	1.18907e-06	3.78334e-07	1.17124e-07	3.53048e-08	1.03691e-08	2.96929e-09	13
115		2.1976e-06	3.8751e-05	0.000341654	0.00200816	0.00885264	0.0312203	0.0917529	0.23113	0.509448	0.998139	1.76005	2.82141	4.1459	5.62354	7.08298	8.32642	9.1764	9.51826	9.32436	8.65365	7.62963	6.40646	5.13487	3.93673	2.8924	2.0401	1.38361	0.903614	0.569061	0.346015	0.20338	0.115686	0.0637476	0.0340631	0.017666	0.00890031	0.0043595	0.00207763	0.000964093	0.000435902	0.00019216	19
133		2.29429e-10	6.14884e-09	8.23963e-08	7.3609e-07	4.93191e-06	2.64356e-05	0.000118082	0.000452095	0.00151455	0.0045101	0.0120873	0.0294498	0.0657726	0.135596	0.259575	0.463784	0.776856	1.22472	1.82351	2.57217	3.44678	4.39884	5.35871	6.2442	6.97285	7.47506	7.70523	7.64833	7.3207	6.76549	6.04397	5.22523	4.37623	3.55411	2.80153	2.14522	1.59703	1.1568	0.815864	0.560658	0.375649	28
137		5.73966e-08	1.22131e-06	1.29938e-05	9.21627e-05	0.00049027	0.00208644	0.00739935	0.0224924	0.0598254	0.141444	0.30097	0.582198	1.03236	1.68976	2.56825	3.64323	4.84514	6.06454	7.16911	8.02882	8.54204	8.65531	8.37143	7.74483	6.86658	5.84441	4.78308	3.7695	2.86461	2.10188	1.49082	1.0233	0.680447	0.438754	0.274588	0.166937	0.0986714	0.0567452	0.031775	0.0173365	0.00922234	23
139		5.97568e-05	0.000856339	0.00613584	0.0293097	0.105005	0.300952	0.718794	1.47151	2.63592	4.19709	6.0146	7.8356	9.35727	10.3149	10.5583	10.087	9.03441	7.61569	6.0631	4.57298	3.27663	2.23597	1.45647	0.907471	0.541851	0.310597	0.171192	0.0908609	0.0465026	0.0229793	0.0109768	0.00507424	0.00227237	0.000986788	0.000415914	0.000170292	6.77874e-05	2.62546e-05	9.90103e-06	3.63809e-06	1.30338e-06	16
140		9.74687e-05	0.00134908	0.0093364	0.0430755	0.149054	0.412615	0.951844	1.88209	3.25628	5.00785	6.93144	8.72174	10.0599	10.7108	10.5893	9.7712	8.45279	6.88214	5.29204	3.85515	2.66799	1.75848	1.10633	0.665779	0.383965	0.212581	0.113168	0.0580137	0.0286777	0.0136873	0.00631495	0.00281955	0.00121956	0.000511518	0.000208235	8.23489e-05	3.16612e-05	1.1844e-05	4.31407e-06	1.53107e-06	5.29793e-07	15
141		9.56668e-05	0.00132592	0.00918852	0.0424504	0.147089	0.407724	0.941829	1.8648	3.23072	4.97523	6.89558	8.68831	10.0349	10.6986	10.5914	9.78634	8.4773	6.9114	5.32171	3.88199	2.69018	1.7755	1.11855	0.674037	0.389251	0.215798	0.115035	0.0590506	0.0292297	0.0139696	0.00645385	0.00288546	0.00124975	0.000524886	0.000213965	8.47291e-05	3.26203e-05	1.22192e-05	4.45673e-06	1.58383e-06	5.48791e-07	15
146		0.000105009	0.00144562	0.00995067	0.0456624	0.157154	0.432697	0.992798	1.9525	3.35992	5.13941	7.07524	8.85475	10.1583	10.7574	10.5781	9.70831	8.35317	6.76442	5.17351	3.74852	2.58023	1.69148	1.05845	0.633536	0.363402	0.200113	0.105957	0.0540249	0.0265622	0.0126094	0.00578629	0.0025696	0.00110546	0.000461167	0.000186727	7.34457e-05	2.80861e-05	1.045e-05	3.78584e-06	1.33637e-06	4.59931e-07	15
147		0.000115227	0.00157559	0.0107721	0.0490986	0.167841	0.459004	1.04605	2.04335	3.49255	5.30625	7.25565	9.01928	10.2773	10.81	10.5581	9.62458	8.22527	6.61591	5.0258	3.61693	2.47286	1.61016	1.00077	0.594969	0.338978	0.185404	0.0975068	0.0493809	0.0241151	0.0113705	0.00518259	0.00228599	0.000976815	0.00040475	0.000162778	6.35941e-05	2.41547e-05	8.92666e-06	3.21214e-06	1.12621e-06	3.84987e-07	15
153		0.000115227	0.00157559	0.0107721	0.0490986	0.167841	0.459004	1.04605	2.04335	3.49255	5.30625	7.25565	9.01928	10.2773	10.81	10.5581	9.62458	8.22527	6.61591	5.0258	3.61693	2.47286	1.61016	1.00077	0.594969	0.338978	0.185404	0.0975068	0.0493809	0.0241151	0.0113705	0.00518259	0.00228599	0.000976815	0.00040475	0.000162778	6.35941e-05	2.41547e-05	8.92666e-06	3.21214e-06	1.12621e-06	3.84987e-07	15
157		0.000115227	0.00157559	0.0107721	0.0490986	0.167841	0.459004	1.04605	2.04335	3.49255	5.30625	7.25565	9.01928	10.2773	10.81	10.5581	9.62458	8.22527	6.61591	5.0258	3.61693	2.47286	1.61016	1.00077	0.594969	0.338978	0.185404	0.0975068	0.0493809	0.0241151	0.0113705	0.00518259	0.00228599	0.000976815	0.00040475	0.000162778	6.35941e-05	2.41547e-05	8.92666e-06	3.21214e-06	1.12621e-06	3.84987e-07	15
163		0.000138613	0.00186975	0.0126105	0.0567011	0.19121	0.515847	1.15971	2.23476	3.76808	5.64751	7.61793	9.34165	10.5008	10.8958	10.4981	9.44057	7.95899	6.31522	4.73255	3.35986	2.26606	1.45556	0.892459	0.523408	0.294177	0.158726	0.0823483	0.0411406	0.0198195	0.00921878	0.00414507	0.00180364	0.00076029	0.000310774	0.000123295	4.75179e-05	1.78047e-05	6.49101e-06	2.30414e-06	7.96936e-07	2.68747e-07	15
165		0.000166535	0.00221583	0.0147413	0.0653802	0.217478	0.578731	1.28338	2.43943	4.05722	5.99813	7.9808	9.65349	10.7037	10.9552	10.4117	9.23553	7.68019	6.01109	4.44336	3.11163	2.07009	1.31159	0.793245	0.458891	0.254407	0.1354	0.0692909	0.0341462	0.0162261	0.0074447	0.00330184	0.00141718	0.000589258	0.000237587	9.29765e-05	3.53456e-05	1.30636e-05	4.69777e-06	1.6449e-06	5.61183e-07	1.8667e-07	15
166		0.000166535	0.00221583	0.0147413	0.0653802	0.217478	0.578731	1.28338	2.43943	4.05722	5.99813	7.9808	9.65349	10.7037	10.9552	10.4117	9.23553	7.68019	6.01109	4.44336	3.11163	2.07009	1.31159	0.793245	0.458891	0.254407	0.1354	0.0692909	0.0341462	0.0162261	0.0074447	0.00330184	0.00141718	0.000589258	0.000237587	9.29765e-05	3.53456e-05	1.30636e-05	4.69777e-06	1.6449e-06	5.61183e-07	1.8667e-07	15
169		0.000166535	0.00221583	0.0147413	0.0653802	0.217478	0.578731	1.28338	2.43943	4.05722	5.99813	7.9808	9.65349	10.7037	10.9552	10.4117	9.23553	7.68019	6.01109	4.44336	3.11163	2.07009	1.31159	0.793245	0.458891	0.254407	0.1354	0.0692909	0.0341462	0.0162261	0.0074447	0.00330184	0.00141718	0.000589258	0.000237587	9.29765e-05	3.53456e-05	1.30636e-05	4.69777e-06	1.6449e-06	5.61183e-07	1.8667e-07	15
172		0.000166535	0.00221583	0.0147413	0.0653802	0.217478	0.578731	1.28338	2.43943	4.05722	5.99813	7.9808	9.65349	10.7037	10.9552	10.4117	9.23553	7.68019	6.01109	4.44336	3.11163	2.07009	1.31159	0.793245	0.458891	0.254407	0.1354	0.0692909	0.0341462	0.0162261	0.0074447	0.00330184	0.00141718	0.000589258	0.000237587	9.29765e-05	3.53456e-05	1.30636e-05	4.69777e-06	1.6449e-06	5.61183e-07	1.8667e-07	15
175		0.000199831	0.00262242	0.0172073	0.0752717	0.246951	0.648159	1.41765	2.65774	4.35976	6.35712	8.34258	9.95285	10.8844	10.9876	10.2995	9.01081	7.39067	5.70525	4.15951	2.87296	1.88512	1.17804	0.702712	0.400949	0.219239	0.115085	0.0580878	0.0282333	0.0132325	0.00598805	0.00261941	0.00110887	0.00045475	0.000180842	6.98007e-05	2.61717e-05	9.54046e-06	3.38382e-06	1.1686e-06	3.93224e-07	1.29009e-07	15
182		3.36229e-05	0.000501165	0.00373505	0.0185576	0.0691523	0.20615	0.512126	1.0905	2.0318	3.36499	5.01568	6.79646	8.44204	9.67943	10.3055	10.2405	9.53999	8.36459	6.92657	5.43388	4.04973	2.87444	1.94749	1.2621	0.783842	0.467341	0.267921	0.147907	0.0787365	0.0404692	0.0201071	0.00966791	0.00450328	0.00203404	0.000891718	0.000379756	0.000157235	6.33421e-05	2.48459e-05	9.49589e-06	3.53852e-06	16
193		0.000115227	0.00157559	0.0107721	0.0490986	0.167841	0.459004	1.04605	2.04335	3.49255	5.30625	7.25565	9.01928	10.2773	10.81	10.5581	9.62458	8.22527	6.61591	5.0258	3.61693	2.47286	1.61016	1.00077	0.594969	0.338978	0.185404	0.0975068	0.0493809	0.0241151	0.0113705	0.00518259	0.00228599	0.000976815	0.00040475	0.000162778	6.35941e-05	2.41547e-05	8.92666e-06	3.21214e-06	1.12621e-06	3.84987e-07	15
195		0.000151958	0.00203579	0.0136368	0.0608979	0.203963	0.546503	1.22026	2.33541	3.91096	5.82171	7.79939	9.49901	10.6049	10.9288	10.4582	9.3406	7.82104	6.16348	4.58737	3.23459	2.16671	1.38226	0.84174	0.490298	0.27369	0.146666	0.0755729	0.0374984	0.0179417	0.00828851	0.00370139	0.00159961	0.00066969	0.000271875	0.000107127	4.10056e-05	1.52599e-05	5.52534e-06	1.94798e-06	6.69161e-07	2.2412e-07	15
197		0.000199831	0.00262242	0.0172073	0.0752717	0.246951	0.648159	1.41765	2.65774	4.35976	6.35712	8.34258	9.95285	10.8844	10.9876	10.2995	9.01081	7.39067	5.70525	4.15951	2.87296	1.88512	1.17804	0.702712	0.400949	0.219239	0.115085	0.0580878	0.0282333	0.0132325	0.00598805	0.00261941	0.00110887	0.00045475	0.000180842	6.98007e-05	2.61717e-05	9.54046e-06	3.38382e-06	1.1686e-06	3.93224e-07	1.29009e-07	15
205		0.00097388	0.011238	0.0648398	0.249404	0.719492	1.6605	3.19353	5.26448	7.59361	9.73619	11.235	11.7859	11.3335	10.0601	8.29198	6.37896	4.60058	3.12282	2.00197	1.21587	0.70152	0.385481	0.202192	0.101442	0.0487742	0.022513	0.00999178	0.00427034	0.0017599	0.000700281	0.00026936	0.000100266	3.61566e-05	1.26432e-05	4.29103e-06	1.41474e-06	4.53478e-07	1.41429e-07	4.29474e-08	1.27074e-08	3.66588e-09	13
208		0.00115399	0.0131205	0.0745883	0.282682	0.803503	1.82712	3.46229	5.62361	7.99234	10.0967	11.4797	11.8655	11.2422	9.83238	7.98508	6.05253	4.30097	2.87651	1.81695	1.08727	0.618097	0.334647	0.172947	0.0854936	0.0405015	0.0184196	0.00805482	0.00339188	0.00137731	0.000539987	0.000204649	7.50581e-05	2.66684e-05	9.18823e-06	3.07257e-06	9.9812e-07	3.15231e-07	9.68671e-08	2.89829e-08	8.4494e-09	2.40168e-09	13
232		0.000115227	0.00157559	0.0107721	0.0490986	0.167841	0.459004	1.04605	2.04335	3.49255	5.30625	7.25565	9.01928	10.2773	10.81	10.5581	9.62458	8.22527	6.61591	5.0258	3.61693	2.47286	1.61016	1.00077	0.594969	0.338978	0.185404	0.0975068	0.0493809	0.0241151	0.0113705	0.00518259	0.00228599	0.000976815	0.00040475	0.000162778	6.35941e-05	2.41547e-05	8.92666e-06	3.21214e-06	1.12621e-06	3.84987e-07	15
238		0.00411954	0.0415957	0.21	0.706803	1.78418	3.60304	6.06342	8.74621	11.039	12.3848	12.5051	11.4788	9.65862	7.50191	5.41058	3.64211	2.29844	1.36516	0.765795	0.406967	0.205461	0.0987895	0.0453407	0.0199049	0.00837433	0.00338228	0.00131352	0.000491217	0.00017714	6.16763e-05	2.07586e-05	6.76139e-06	2.13347e-06	6.52788e-07	1.93862e-07	5.59276e-08	1.56864e-08	4.28078e-09	1.13747e-09	2.94493e-10	7.43387e-11	12
237		1.69452e-05	0.000264188	0.00205944	0.0107027	0.0417155	0.130075	0.337993	0.752792	1.46707	2.5414	3.96222	5.6158	7.29619	8.7502	9.74441	10.1281	9.86905	9.0509	7.83943	6.43275	5.01455	3.72287	2.63828	1.78838	1.16175	0.7245	0.434441	0.25086	0.139682	0.0750943	0.0390258	0.0196271	0.00956248	0.00451775	0.00207161	0.000922797	0.00039964	0.000168396	6.90899e-05	2.76195e-05	1.07652e-05	17
239		0.000182454	0.00241098	0.0159295	0.0701653	0.231794	0.612595	1.34916	2.54686	4.20683	6.17665	8.16194	9.80485	10.7969	10.9748	10.3588	9.12554	7.53666	5.85828	4.30069	2.99106	1.97622	1.24353	0.74692	0.429128	0.236274	0.124887	0.0634721	0.0310642	0.0146603	0.00668012	0.00294241	0.00125424	0.000517932	0.000207395	8.06047e-05	3.04321e-05	1.11704e-05	3.98941e-06	1.38729e-06	4.70047e-07	1.55282e-07	15
243		1.60461e-07	3.2494e-06	3.29008e-05	0.000222085	0.00112432	0.0045536	0.0153687	0.0444603	0.112542	0.253225	0.51279	0.944018	1.59306	2.48154	3.58945	4.84584	6.13314	7.30579	8.21916	8.76007	8.86973	8.55312	7.87291	6.93171	5.84874	4.73757	3.68991	2.76748	2.00152	1.39764	0.943426	0.616282	0.389998	0.239322	0.14254	0.082471	0.0463908	0.0253901	0.0135305	0.00702558	0.00355677	22
239		2.80957e-07	5.53211e-06	5.44643e-05	0.000357471	0.00175967	0.00692968	0.0227412	0.0639684	0.157444	0.344457	0.678244	1.21407	1.99211	3.01732	4.24369	5.57062	6.85543	7.94029	8.6859	9.00144	8.86202	8.3093	7.43691	6.36672	5.22343	4.11402	3.11562	2.27212	1.59781	1.08487	0.712043	0.452268	0.278289	0.166048	0.0961624	0.0540989	0.0295894	0.0157466	0.0081593	0.00411945	0.00202782	21
